# Supplementary material for: Cross-Family Translational Genomics of Abiotic Stress-Responsive Genes between Arabidopsis and Medicago truncatula
Source: PLoS One. 2014 Mar 27;9(3):e91721. doi: 10.1371/journal.pone.0091721 (PMC3968010; doi:10.1371/journal.pone.0091721)
Supplement: Table S1 — Genome-wide list of genes associated with abiotic stress responses. (XLSX) [file pone.0091721.s003.xlsx]

## Sheet: Sheet1
Table S1. Genome-wide list of genes associated with abiotic stress responses
Putative orthologous loci			E value	Homology remarks	Symbol	Annotation	GO ID*	Expression cues	Ref No**
Arabidopsis		M. truncatula
At1g01060		Mt7g118330	2e-93	Specific	LHY	Similar to transcription factor CCA1	GO3	Cold	1
At1g01470		Mt7g079180	4e-66	Very specific	LEA14	Late embryogenesis abundant protein	GO6	cold	2
At1g01520		Mt7g038290	8e-85	Specific	ASG4	Altered seed germination 4	GO3	salt stress	TAIR
At1g01620		Mt3g070210, Mt5g082070	2e-152	Specific but multiple homologs	PIP1	Intrinsic protein subfamily	GO2	water deprivation	TAIR
At1g01720		Mt3g088110	5e-118	Specific	ANAC002	NAC domain protein	GO3	Salinity	7
At1g01860		Mt7g076280	6e-137	Unique	PFC1	Dimethyladenosine transferase	GO17	cold	TAIR
At1g02205		Mt8g009560	0	Specific	CER1	CER1 protein, possible aldehyde decarbonylase	GO15	Drought, heat	10
At1g02270		AC233657_24.1	0	Specific	N/A	Uncharacterized calcium-binding protein	GO18	cold	TAIR
At1g02300		Mt7g111050, Mt7g111060	8e-158	Specific	CysP	Cathepsin B-like Cys protease	GO8	Drought, heat	10
At1g02660		Mt1g087690, Mt1g087330	0	Specific	LIP	Lipase family protein	GO9	abiotic stress, ABA, Salt	12
At1g02670		Mt4g049500	0	Unique	DNARP	DNA repair protein, putative	GO10	ABA, water deprivation, salt stress	12
At1g02750		Mt1g083780	2e-28	Less specific	Fb2	Fiber protein Fb2	GO6	water deprivation	TAIR
At1g02920		Mt3g064700	5e-43	Less specific	GST11	Glutathione S-transferase	GO1	ROS, cold	3
At1g02930		Mt3g064700	6e-41	Less specific	GST1	Glutathione S-transferase	GO1	water deprivation, oxidative stress	TAIR
At1g02950	6	Mt1g026140	2e-42	Less specific	GST31	Glutathione S-transferase	GO1	stresses, osmotic stress	AtGI
At1g03020		Mt7g108250, Mt2g019900	5e-39	Less specific	GLR	Glutaredoxin	GO1	Drought	18
At1g03600		Mt3g076650	0.53	Uncertain, Low E value	PIIP	Photosystem II protein family	GO12	Drought	18
At1g03680		Mt4g085880	9e-28	Less specific and multiple	TRXM	Thioredoxin m	GO1	cold	TAIR
At1g03870		Mt7g101080	1e-50	Less specific	FLA9	Fasciclin-like arabinogalactan protein 9	GO18	Salinity	1
At1g03880		Mt1g072630, Mt1g072600, Mt1g072610	1e-71	Multiple	CRU2	Cruciferin 12S seed storagem protein	GO16	Drought/dehydration	4
At1g03940		Mt2g089670	8e-62	Less specific	AAAT	Anthocyanin 5-aromatic acyltransferase	GO18	Drought, heat	10
At1g04120		AC151738_59.1	0	Specific but multiple homologs	MRP5	Multidrug resistance-associated protein 5	GO1	Salinity	TAIR
At1g04220		AC233668_10.1	0	Specific	KCS17	β-ketoacyl-CoA synthase	GO6	Drought, heat	10
At1g04400		Mt1g043190	0	Specific	CRY2	Cryptochrome 2 apoprotein, putative	GO6	Drought/dehydration	4
At1g04980		Mt5g084930	0	Very specific	PDIL2-2	Disulfide isomerase-related protein	GO1	Drought, heat	10
At1g05000		Mt5g085300	2e-91	Specific	TyrPP	Tyrosine-protein phosphatase	GO18	Drought	18
At1g05100		Mt2g088020, Mt4g049730	3e-72	Specific	MAPKKK18	Mitogen-activated protein kinase kinase kinase 18	GO4	ABA, drought	14
At1g05180		Mt4g048220	0	Very specific	AXR1	Auxin resistant protein 1	GO5	water deprivation	TAIR
At1g05250		AC235488_1.1	2e-87	Specific	PRX2	Peroxidase	GO6	cold, mannitol, NaCl	1
At1g05260		Mt2g088770	5e-148	Specific	PER3	peroxidase 3	GO6	Cold	AtGI
At1g05340		Mt4g091090	0.0001	Uncertain, Low E value	N/A	Unknown protein	GO18	cold, mannitol, NaCl	1
At1g05560		Mt3g084520	5e-114	Specific	UGT1	UDP-glucose transferase	GO5	ABA, drought	14
At1g05700		Mt2g100450	0	Multiple	RLK	Receptor-like protein kinase	GO4	cold, mannitol, NaCl	1
At1g05850		Mt7g021640	3e-165	Specific	POM1	Endo-chitinase	GO6	water deprivation, heat, salt stress	TAIR
At1g06040		Mt2g099010	2e-60	Very specific	STO	Salt-tolerance protein	GO3	Salt	AtGI
At1g06180		Mt1g043080	2e-67	Specific but multiple	MYB13	Myb domain protein 13	GO3	salt stress, abscisic acid stimulus	TAIR
At1g06430		Mt7g010800	0	Very specific	FTSH8	Cell division protease FtsH, putative	GO8	Drought, heat	10
At1g06570		Mt5g091060	0	Very specific	PDS1	1,4-hydroxyphenylpyruvate dioxygenase	GO15	Salinity	1
At1g07070		Mt5g081710	7e-66	Specific	RPL35aA	60S ribosomal protein L35a	GO8	Salinity	6
At1g07350		Mt8g074790, Mt5g023060	3e-32	Multiple	TSRR	Transformer-SR ribonucleoprotein	GO10	Drought, heat	10
At1g07430		Mt5g080680	9e-108	Specific	PP2C	Protein phosphatase 2C	GO4	Drought, heat	10
At1g07720		Mt4g062270, Mt4g062170	0	Specific	KCS3	Fatty acid elongase 3-ketoacyl-CoA synthase	GO9	Drought, heat	10
At1g07890		Mt4g073410, Mt5g022510	7e-73	Specific	APX1	Ascorbate Peroxidase	GO1	ABS, ethylene stimulus	13
At1g07900		Mt2g093310	6e-63	Specific but multiple	LBD1	Lateral organ boundaries (LOB) domain family	GO16	Drought	18
At1g08050		Mt4g058700	1e-163	Specific but two homologs	ZF	Zinc-finger protein	GO3	ROS, ABA	3
At1g08090		AC233663_23.1, Mt2g085510	0	Specific but two genes	NRT2	High-affinity nitrate transporter	GO2	cold, mannitol, NaCl	1
At1g08720		Mt1g016300	0	Specific	EDR1	Enhanced disease resistance 1	GO4	water deprivation	TAIR
At1g08810		Mt7g087350, Mt7g087130	1e-29	Multiple	MYB60	Myb domain protein 60	GO3	water deprivation, salt stress	TAIR
At1g08830		Mt7g114240	5e-88	Specific	CSD1	Copper/zinc superoxide dismutase	GO1	ABS, ROS, water deprivation	3
At1g08920		Mt7g113970	1e-139	Specific	ERD6	Carbohydrate transporter/ sugar porter	GO2	cold, mannitol, NaCl	1
At1g08930		Mt7g113970	4e-148	Specific	ERD6	Carbohydrate transporter/ sugar porter	GO2	Drought	AtGI
At1g09140		Mt7g112760, Mt1g083400	8e-82	Specific	SRP30.1	SF2/ASF splicing modulator	GO10	Drought, heat	10
At1g09180		Mt2g034640, Mt4g121860, Mt4g121630	1e-94	Specific but multiple	SAR1	GTP-binding protein, similar to SAR1, putative	GO2	Salinity	6
At1g09340		Mt1g072260	2e-37	Specific	CRB	Chloroplast RNA binding	GO15	cold	TAIR
At1g09350		Mt7g109920	7e-155	Specific	GolS3	Galactinol synthase	GO11	Drought, salt, cold	8
At1g09560		Mt1g085140	3e-97	Specific	GLP5	Germin-like protein	GO18	cold	TAIR
At1g09760		Mt7g079460	5.1	Low E, Uncertain	U2A	U2 small nuclear ribonucleoprotein A	GO10	cold	TAIR
At1g09780		Mt7g074570	0	Unique	IPGAM1	2,3-biphosphoglycerate-independent phosphoglycerate mutase	GO17	cold	TAIR
At1g09950		Mt8g094690	2e-17	Uncertain, Low E value	ZW2	Transcription factor-related; similar to ZW2	GO18	Drought, heat	10
At1g09970		Mt2g010470	0	Unique	IKU2	Leu-rich repeat receptor-like kinase	GO4	Salinity	7
At1g10020		Mt3g110630	5e-157	Specific	N/A	Unknown protein	GO18	cold, mannitol, NaCl	1
At1g10050		Mt3g117800	5e-71	Specific	XYL	Xylan endohydrolase, putative	GO11	Drought, heat	10
At1g10070		Mt5g014960	2e-147	Specific	BCAT-2	Branched-chain amino acid aminotransferase	GO8	Drought/dehydration	4
At1g10080		NA			N/A	Unknown protein	GO18	cold	1
At1g10170		Mt6g071140	0	Very specific	NFXL1	NF-X1 type zinc finger family protein	GO3	Salinity	1
At1g10370		Mt5g037380	1e-72	Specific	GST30	Glutathione S-transferase	GO1	stresses	AtGI
At1g10760		Mt1g013580, Mt1g013530	0.079	Low E, Uncertain	SEX1	Starch excess 1	GO6	cold acclimation	TAIR
At1g10940		Mt8g095330, Mt2g006330	0	Specific but multiple	SRK2A	Arbidopsis serine / threonine kinase 1	GO4	osmotic stress, salt stress	TAIR
At1g11270		Mt3g080370	4e-08	Low E, Uncertain		F-box and bHLH containing protein	GO18	heat acclimation	TAIR
At1g11480		Mt8g092510	0.29	Uncertain, Low E value	EIF4B	Similar to eukaryotic initiation factor 4B	GO3	Drought, heat	10
At1g11580		Mt7g050980, Mt7g050870	1e-173	Specific but multiple	PME	Pectin methylesterase precursor	GO13	Drought	18
At1g11840		Mt4g132270	2e-152	Specific	GLX1	Lactoylglutathione lyase-like protein	GO11	Drought, heat	10
At1g12010		Mt2g025120	4e-139	Specific but multiple	ACCO	1-aminocyclopropane-1-carboxylate oxidase, putative	GO5	Salinity	1
At1g12080		N/A			N/A	Unknown protein	GO18	Salinity	1
At1g12100		Mt4g101280	1e-39	Multiple	PILTP	Protease inhibitor / seed storage / lipid transfer protein family protein	GO2	Salinity	6
At1g12110		Mt4g101380	0	Specific	NRT1.1	Dual-affinity nitrate transporter	GO2	water deprivation	TAIR
At1g12240		Mt4g101630	0	Very specific	VAC-INV	Vacuolar invertase	GO11	Drought	18
At1g12520		Mt4g101820	5e-104	Very specific	CCS1	Superoxide dismutase copper chaperone	GO1	ABS, ROS, salt	3
At1g12550		Mt4g013090	2e-93	Specific	OXR	Oxidoreductase family	GO8	Drought	18
At1g12610		Mt1g101600	1e-51	Multiple	DREB1F	Dehydration-responsive element-binding protein 1F	GO3	Drought, salt stress	15
At1g13080		Mt5g073020	5e-115	Specific	CYP71B2	Cytochrome P450-like protein family 71 subfamily B	GO17	heat acclimation	TAIR
At1g13710		Mt5g045250	0	Specific	CYP78A5	Cytochrome P450-like protein family 78 subfamily A	GO6	Salinity	6
At1g14020		Mt5g042200	0	Specific	AXI1	Growth regulator protein similar to Nicotiana tabacum auxin-independent growth promoter axi 1	GO16	Salinity	6
At1g14040		Mt7g011330	0	Very specific	EXS	Polytropic retrovirus receptor	GO2	Drought, heat	10
At1g14210		Mt5g041010	1e-71	Less specific	RNT2	Ribonuclease	GO18	cold, mannitol, NaCl	1
At1g14660		Mt2g038400	3e-40	Unique	NHX8	Sodium proton exchanger, putative	GO2	Salt	AtGI
At1g14920		Mt7g027250	2e-69	Specific	GAI	GA insensitive	GO3	Salinity	TAIR
At1g14960		Mt1g031640	3e-15	Uncertain, Low E value	MLP	Major latex protein	GO6	Salinity	7
At1g15360		Mt3g107380	6e-55	Fairly specific	ERF	Ethylene response factor subfamily B-6 of ERF/AP2 transcription factor family	GO3	water deprivation	TAIR
At1g15550		Mt2g102620, Mt2g102570	4e-133	Specific	GA3OX1, GA4	Gibberellin 3 beta-hydroxylase	GO6	Drought, heat	10
At1g15690		Mt4g115970	0	Unique	AVP1	Pyrophosphatase	GO15	Drought	18
At1g15950		Mt4g006940	6e-149	Very specific	CCR1	Cinnamoyl-CoA reductase	GO7	cold	TAIR
At1g16410		Mt8g073950	4e-70	Less specific	CYP79F1	Cytochrome P450-like protein family 79 subfamily F	GO6	Drought/dehydration	4
At1g16540		Mt4g030930	0	Unique	LOS5	Molybdenum cofactor sulfurase	GO6	Drought, osmotic stress, heat, salt stress	AtGI
At1g16850		Mt8g091950	0.0001	Uncertain, Low E value	LEA	Late embryogenesis abundant protein	GO16	Drought, salt, cold	8
At1g16880		Mt4g007140	2e-121	Very specific	ACR11	Act domain repeat 11	GO18	cold	TAIR
At1g17020		AC235677_23.1	4e-126	Specific	SRG1	Senescence-related gene 1	GO1	Drought, heat	10
At1g17100		Mt7g104650	0.0008	Uncertain, Low E value	SOUL	SOUL heme-binding family protein	GO18	Salinity	6
At1g17190		Mt2g066630, Mt8g056940	2e-82	Specific but multiple	GSTU26	Glutathione S-transferase	GO1	Salinity, cold	6
At1g17200		Mt3g064310	4e-58	Specific	IMP	Integral membrane family protein	GO18	Drought	18
At1g17665		Mt2g100100	7e-67	Very specific	DHL	Dehydrogenase-like protein	GO18	Drought, heat	10
At1g18100		Mt8g106840	5e-90	Very specific	MFT	Mother of flowering-time and TF1 protein	GO18	Salinity	6
At1g18140		Mt7g058690, Mt7g060460	0	Specific but multiple	LAC1	Laccase, putative similar to high-pI laccase	GO7	salinity	6
At1g18330		Mt5g076960	2e-33	Specific	EPR1	Early-phytochrome-responsive 1	GO3	salt stress	TAIR
At1g18390		Mt7g082530	3e-147	Specific	RLK	Receptor-like kinase	GO4	Drought	18
At1g18570		Mt4g091490	1e-63	Multiple	MYB51	Myb domain protein 51	GO3	salt stress, abscisic acid stimulus	TAIR
At1g18650		Mt4g083070	2e-38	Multiple	PDCB3	Plasmodesmata callose-binding protein 3	GO11	Salinity	6
At1g18710		Mt6g012690	2e-58	Specific but multiple	MYB47	Myb domain protein 47	GO3	salt stress	TAIR
At1g19570.1		Mt5g012270	0.33	Uncertain, Low E value	DHAR1	Dehydroascorbate Reductase	GO5	ABS, heat	13
At1g19730.1	4	Mt1g023140	5e-41	Specific	TRX4	Thioredoxins (Trx)	GO1	ABS, oxidative stress	13
At1g20440		Mt3g117290	6e-14	Less specific	RD17	Dehydrin, Cold regulated 47	GO6	Drought, salt, cold	8
At1g20450		Mt3g117290	8e-18	Less specific	ERD10	Early responsive to dehydration 10	GO6	cold, mannitol, NaCl	1
At1g20630.1		Mt8g101950	0.18	Uncertain, Low E value	Cat1	Catalase	GO1	ABS, metal ion	13
At1g21050		Mt3g086740	2e-43	Specific	N/A	Unknown protein	GO18	Drought	18
At1g21400		Mt3g096390	0	Very specific	AKDH	Alpha keto-acid dehydrogenase	GO17	Drought, heat	10
At1g21460		AC147714_7.1	5e-64	Specific	MtN3	Nodulin MtN3 family protein	GO18	Drought, heat	10
At1g21510		Mt2g097700	0.37	Uncertain, Low E value	N/A	Unknown protein	GO18	Salinity	6
At1g22360		Mt5g064240	0	Specific but multiple	UGT	UDP-glucose glucosyltransferase	GO11	Drought	18
At1g22370		Mt5g064240	2e-120	Specific but multiple	UGT	UDP-glucose glucosyltransferase	GO11	Drought, heat	10
At1g22640		Mt4g073420	9e-83	Specific but multiple	MYB3	Myb domain protein 3	GO3	salt stress	TAIR
At1g22710		Mt4g131920	0	Specific but multiple	SUC2	Sucrose transporter	GO2	cold, mannitol, NaCl	1
At1g22770		Mt1g098160	0	Unique	GI	Gigantea protein, putative	GO15	Drought, heat	10
At1g22990		Mt5g025150	5e-50	Specific but multiple	CCH	Metal-binding protein	GO2	Drought, heat	10
At1g23090		Mt1g071530	0	Very specific	ST91	Sulfate transporter	GO2	Drought	18
At1g23740		Mt6g012170	4e-123	Specific but multiple	AOR	Alkenal/one oxidoreductase	GO17	cold	TAIR
At1g23800		Mt4g107040	0	Specific but multiple	ALDH2B7	Aldehyde dehydrogenase 2B7	GO15	Drought	18
At1g24280		Mt7g022440	0	Specific	G6PD3	Glucose-6-phosphate dehydrogenase 3	GO11	cold, mannitol, NaCl	1
At1g24440		Mt3g086130	7e-104	Specific	ZF	zinc finger protein	GO3	ABA, drought	14
At1g24600		Mt8g105190	4e-06	Uncertain, Low E value	N/A	Unknown protein	GO18	ABA, drought	14
At1g24620		Mt8g105230	3e-67	Specific	CML25	Putative calcium-binding protien	GO18	cold	TAIR
At1g25530		Mt5g054730	0	Specific	AAP	Amino acid permease	GO2	Drought	18
At1g26580		Mt7g078120	2e-21	Less specific	MYB	MYB family transcription factor, putative	GO3	Drought, heat	10
At1g26770		Mt5g041700	7e-108	Specific but multiple	EXPA10	Arabidopsis thaliana expansin A10	GO13	ABA, drought	14
At1g27020		Mt5g038460	1e-100	Unique	N/A	Unknown protein	GO18	Salinity	6
At1g27140		Mt8g061950	8e-56	Specific	GST13	Glutathione S-transferase	GO1	stresses	AtGI
At1g27200		Mt5g037020	2e-174	Very specific	N/A	Similar to zinc finger family protein	GO3	cold, mannitol, NaCl	1
At1g27320		Mt3g085130	0	Specific	AHK3	Histidine kinases	GO4	cold, drought, osmotic stress, salinity	TAIR
At1g27730		Mt1g018420	3e-44	Specific	ZAT10	C2H2 zinc finger DNA-binding protein	GO3	ROS	3
At1g28380		Mt7g116350	3e-147	Specific	NSL1	Necrotic spotted lesions 1	GO6	salt stress	TAIR
At1g28480.1		Mt2g014760, Mt4g079110	4e-25	Multiple	GLR	Glutaredoxin	GO1	ABS	13
At1g28490		Mt5g092870	9e-79	Very specific	SYP61	Syntaxin 61	GO2	osmotic stress	AtGI
At1g28540		Mt2g014970	8e-17	Uncertain, Low E value	N/A	Unknown protein	GO18	abiotic stress, ABA	12
At1g29050		Mt2g015720	2e-155	Specific	TBL38	Trichome birefringence-like 38	GO18	Drought	18
At1g29390		Mt8g088110	1e-44	Unique	COR314-TM2	Cold regulated 314 thylakoid membrane 2	GO18	Cold	2
At1g29395		Mt8g088110	5e-43	Unique	COR414-TM1	Cold regulated 414 thylakoid membrane 1	GO6	Drought/dehydration	4
At1g29670		Mt8g087890	4e-169	Very specific	GDSL	GDSL-motif lipase/hydrolase family protein	GO9	Salinity	6
At1g29930		Mt6g012110	1e-153	Specific	CAB1	Chlorophyll a/b-binding protein	GO12	Drought	18
At1g30360		Mt2g018780	0	Unique	ERD4	Early-responsive to dehydration stress protein 4	GO6	Drought	AtGI
At1g30500		Mt2g030170, AC235675_5.1	1e-45	Specific but multiple	CBF	CCAAT-binding transcription factor family protein	GO3	Drought, heat	10
At1g30760		Mt2g031390	0	Unique	RCLNO	Reticuline oxidase-like protein	GO18	Salinity	1
At1g31020.1		Mt8g107460	5e-15	Less specific, Low E value	ATO2	Thioredoxins (Trx)	GO1	ABS, salt stress	13
At1g31230		Mt8g083210	0	Specific	AK-HSDH I	Asp kinase-homoserine dehydrogenase	GO8	cold, mannitol, NaCl	1
At1g31330		Mt7g076170	0.13	Uncertain, Low E value	PSAF	Photosystem I subunit F	GO12	Drought	18
At1g31470		Mt8g071920	7e-172	Specific	NFD4	Nuclear fusion defective 4	GO18	salt stress	TAIR
At1g32060		Mt5g027530	0	Unique	PRK	Phosphoribulo kinase	GO12	cold	TAIR
At1g32200		Mt5g029230	0	Very specific	GPAT	Glycerol-3-phosphate acyltransferase, chloroplast	GO9	Cold	AtGI
At1g32230		Mt5g032190	9e-110	Fairly specific	RCD1	Radical-induced cell death 1	GO14	oxidative stress, salt stress	TAIR
At1g32350.1		Mt5g026620	3e-142	Specific but multiple	AOX	Alternative Oxidase	GO17	ABS	13
At1g32470		Mt5g014260	1e-76	Specific	GCSHP	Glycine cleavage system H protein*	GO8	Drought	18
At1g32550		Mt4g098490	7e-77	Unique	FDX	Ferredoxin family protein	GO1	abiotic stress, ABA, cold	12
At1g32560		Mt4g098480	9e-22	Unique	LEA	Late-embryogenesis abundant protein	GO16	Drought, heat	10
At1g32640		Mt5g030430	1e-158	Specific	RD22BP1	Basic helix-loop-helix (bHLH) protein (RAP-1)	GO3	Drought	TAIR
At1g32900		Mt6g012380	2e-74	Specific	GBSS	Granule-bound starch synthase-like protein	GO11	Salinity	7
At1g33110		Mt7g087400, Mt7g087380, Mt7g087410	0	Specific but multiple	MATE	MATE efflux family protein	GO2	ABA, drought	14
At1g33265		Mt2g069490	0.12	Uncertain, Low E value	N/A	Unknown protein	GO18	Salinity	6
At1g33560		Mt1g021100	0	Specific	ADR1	NBS-LRR disease resistance protein	GO4	water deprivation	TAIR
At1g35515		Mt4g073420	1e-79	Specific	HOS10	R2R3 MYB transcription factor	GO3	cold, drought	5
At1g35670		Mt8g095440, Mt3g098070	0	Specific but multiple	CDPK2	Calcium-dependent protein kinase 2	GO4	Cold	AtGI
At1g35720		Mt5g063670	4e-145	Specific but multiple	ANNAT1	Annexin arabidopsis 1	GO17	osmotic stress, oxidative stress, ABA	TAIR
At1g36730		Mt7g082940	4e-138	Unique	EIF-5	Eukaryotic translation initiation factor 5	GO3	Drought, heat	10
At1g37130		Mt5g059820	0	Very specific	NIA2	Nitrate reductase	GO15	Drought	18
At1g42700		Mt5g044500	6e-05	Low E, Uncertain	N/A	unknown protein	GO18	cold	TAIR
At1g42970		Mt3g115920	0	Very specific	GAPB	Glyceraldehyde-3-phosphate dehydrogenase B subunit	GO11	cold	TAIR
At1g43560.1	10	Mt1g098660	1e-55	Specific	ATY2	Thioredoxins (Trx)	GO1	ABS, cold	13
At1g44170		Mt3g088150	0	Specific but two genes	ALDH4	Aldehyde dehydrogenase 4	GO18	desiccation, salt stress	TAIR
At1g44446		Mt1g030550	7e-159	Specific	CAO	Chlorophyll a oxygenase	GO12	Salinity	7
At1g45249		Mt3g101780	2e-56	Specific but multiple	AREB1	Abscisic acid responsive elements-binding factor	GO3	ABA, salt stress, water deprivation	AtGI
At1g46768		Mt3g102100, Mt1g019110	2e-41	Specific but multiple	RAP2.1	AP2 domain DNA-binding protein	GO3	Cold	2
At1g47128		Mt1g025140	0	Very specific	RD21A	Cysteine proteinase RD21a/ thiol protease	GO8	water deprivation	AtGI
At1g47128		Mt1g025140	0	Very specific	RD21	cysteine proteinase precursor	GO8	cold, osmotic stress, salt stress	TAIR
At1g47840		Mt1g025140	0	Unique	HXK3	hexokinas 3	GO11	Drought, heat	TAIR
At1g47960		Mt4g122750	6e-39	Less specific	C/VIF1	Similar to invertase inhibitor	GO17	Drought, heat	10
At1g48000		Mt2g033170	3e-80	Specific	MYB112	Myb-related transcription factor	GO3	Drought	10
At1g48910		Mt5g033260	2e-147	Very specific	FMO	Flavin-containing monooxygenase	GO2	salt stress	18
At1g49010		Mt5g069710	7e-41	Fairly specific	MYB	Myb family transcription factor	GO3	oxidative stress, salt stress	TAIR
At1g49300		Mt4g069850	5e-127	Specific but multiple	ATRAB7	Small GTPase	GO15	cold, mannitol, NaCl	TAIR
At1g49570		Mt5g017850	1e-110	Multiple homolog	PER	Peroxidase	GO1	salt stress, abscisic acid stimulus	1
At1g49950		Mt4g097130	4e-52	Less specific	TRB1	Telomere repeat binding factor 1	GO17	ABS, ozen, zinc ion, fungi, JA	TAIR
At1g50320.1	13	Mt1g114290	3e-54	Very specific	THX	Thioredoxin x	GO1	cold, osmotic stress, salt stress	13
At1g50460		Mt5g009000	7e-160	Specific	HKL1	Hexokinase-like 1	GO11	Drought	TAIR
At1g50490		Mt4g076380, Mt4g076200	1e-88	Multiple	UBC20	Ubiquitin-conjugating enzyme	GO8	heat, osmotic stress	18
At1g50500		Mt2g028270	0	Unique	HIT1	Heat-intolerant 1	GO2	cold	TAIR
At1g51090		Mt4g134030, Mt4g133900	6e-31	Multiple	HMAP	Heavy-metal-associated protein	GO2	Drought, heat	2
At1g51140		Mt1g105280	2e-56	Specific	BHLH	Basic helix-loop-helix family protein	GO3	abiotic stress, ABA	10
At1g52220		Mt7g118290	1e-21	Less specific	TMP14	Similar to thylakoid membrane phosphoprotein of 14 kDa	GO18	water deprivation, heat	12
At1g52340		Mt3g020670	4e-110	Very specific	ABA2	Cytosolic short-chain dehydrogenase/reductase	GO5	Drought, heat	TAIR
At1g52560		Mt4g010320	5e-35	Specific	HSP26.5-P	Chloroplast-small heat shock protein	GO6	ABS, ROS, salt stress	10
At1g52690		Mt1g045950	4e-12	Uncertain	LEA	Late embryogenesis-abundant protein	GO16	ABA, drought	3
At1g52890		Mt3g088110	5e-70	Specific	ANACO19	NAC transcription factor	GO3	ABS	14
At1g52990.1		Mt4g085880	7e-12	Uncertain	TRX	Thioredoxins	GO1	cold	13
At1g53240		Mt5g014710	2e-133	Specific	MDH	Malate dehydrogenase	GO15	Salinity	TAIR
At1g53280		Mt4g085900	1e-84	Unique	MTMS	4-methyl-5(b-hydroxyethyl)-thiazole monophosphate biosynthesis protein, putative	GO6	Salinity	7
At1g53310		Mt4g079860, Mt2g092930, Mt2g076670	0	Multiple	PPC1	Phosphoenolpyruvate carboxylase 1	GO11	Drought, heat	7
At1g53540		Mt4g091590, Mt6g061940	2e-63	Multiple	HSP17.6C-CI	17.6-kD Heat shock protein	GO6	cold	10
At1g54000		Mt8g022810	1e-28	Less specific	MyAP	Myrosinase-associated protein, putative	GO9	Salinity	1
At1g54010		Mt8g022810	2e-30	Less specific	MyAP	Myrosinase-associated protein, putative	GO9	Drought, heat	7
At1g54100		Mt2g042330	0	Unique	ALDH7B4	Aldehyde dehydrogenase, putative	GO6	abiotic stress, ABA, dehydration	10
At1g54130		Mt8g020880	0	Very specific	RSH3	RelA / SpoT homolog	GO15	cold	12
At1g54410		Mt7g086340	1e-08	Uncertain	DRP	Dehydrin family protein	GO6	Salinity	2
At1g55490		Mt8g017080	2e-131	Specific but multiple	CPN60B	Rubisco subunit binding-protein β subunit	GO8	Drought	7
At1g55790		Mt3g061070	1e-87	Specific	PALL	Phenylalanine-trna ligase	GO18	cold	18
At1g55920		Mt5g095470	2e-133	Specific	SAT1	Serine acetyltransferase 1	GO8	Drought	TAIR
At1g56010		Mt2g064470	7e-65	Specific	ANAC021	NAC domain protein	GO3	Salinity	18
At1g56040		Mt7g077780	3e-30	Less specific	UBP	U-box domain-containing protein	GO8	cold	6
At1g56070		Mt2g069050, Mt2g069310	0		LOS1	Low expression of osmotically reponsive genes 1	GO6	Drought, heat	TAIR
At1g56170		Mt3g099180, Mt7g113680	2e-54	Specific but multiple	HAP5B	Heme activator protein homolog 5B	GO3	water deprivation	10
At1g56280		Mt1g083780	8e-55	Specific	ATDI19	Drought-induced 19	GO18	Drought, heat	TAIR
At1g56340		Mt1g083960	0	Very specific	CRT1	Calreticulin	GO4	Drought, heat	10
At1g56600		Mt7g109920	5e-171	Very specific	GolS2	Galactinol synthase	GO11	Drought, heat, salt stress	10
At1g56650		Mt5g079290	1e-51	Multiple	MYB75	Anthocyanin2	GO3	cold, salinity	10
At1g57550		Mt7g111350	3e-19	Uncertain	N/A	Hydrophobic protein	GO18	Drought, heat	TAIR
At1g57590		Mt7g110900	0	Specific but multiple	PME	Pectinacetylesterase precursor	GO13	Osmotic stress	10
At1g58200		Mt3g100280	4e-172	Very specific	MSL3	MSCS-like 3	GO2	ABA, drought	TAIR
At1g58270		Mt4g123750	2e-22	Less specific	N/A	Unknown protein	GO18	Drought	14
At1g58290		Mt3g111190	0	Very specific	HEMA1	Glutamyl-tRNA reductase 1	GO12	Drought/dehydration	18
At1g58360		Mt3g110660	0	Very specific	AAP1	Amino acid permease 1	GO2	abiotic stress, ABA	4
At1g58520		Mt6g012870	8e-135	Specific	ERD4	Early-responsive to dehydration stress protein 4	GO6	Drought	12
At1g59950		Mt4g072350	2e-106	Specific	AKR	Aldo/keto reductase	GO15	cold, mannitol, NaCl	18
At1g59990		Mt8g062720	0	Unique	RH22	DEAD box RNA helicase	GO15	cold, mannitol, NaCl	1
At1g60190		Mt5g034440	6e-146	Very specific	PMZ	Zinc-binding protein, putative	GO3	Drought	1
At1g60420		Mt3g114530	1e-88	Specific	PDI	Trypanothione-dependent peroxidase	GO2	Salinity	18
At1g60470		Mt7g109920	7e-165	Specific	GolS4	Galactinol synthase	GO11	Salinity	7
At1g60680		Mt7g021850, Mt7g021680, Mt7g021820	7e-165	Specific but multiple	AGD2	Aldo-keto reductase, Auxin-induced protein, putative	GO15	ABS	1
At1g60740.1		Mt6g087990	1e-71	Unique	PrxR D	Peroxiredoxin D	GO1	osmotic stress, salt stress	13
At1g60940		Mt2g006330, Mt8g095330	0	Specific but multiple	SRK2B	SNF1-related protein kinase 2.10	GO4	Drought, heat	TAIR
At1g61580		Mt1g098540	0	Very specific	RPL3B	Ribosomal protein	GO8	Drought, heat	10
At1g61800		Mt3g049400	7e-180	Very specific	GPT2	Glucose-6-phosphate/phosphate-translocator	GO2	Drought	10
At1g61820		Mt4g131800	0	Very specific	BGLU46	Beta-mannosidase 4	GO11	cold	18
At1g61980		Mt2g019840	1e-38	Less specific	mTERF	Transcription termination factor-related	GO3	Salinity	TAIR
At1g62180		Mt7g027550	4e-40	Less specific	APSR	Adenosine-5′-phosphosulfate reductase, putative	GO15	Drought, heat	6
At1g62290		Mt4g132420	0	Specific	AspP	Aspartyl protease family protein	GO8	Drought, heat	10
At1g62510		Mt4g101330	6e-24	Multiple homolog	PILTP	Protease inhibitor / seed storage / lipid transfer protein family protein	GO2	Drought, heat	10
At1g62570		Mt5g012130	4e-145	Specific	FMO	Flavin-containing monooxygenase	GO2	Drought, heat	10
At1g62710		Mt4g101730	0	Specific	VPE	Cysteine-type endopeptidase	GO8	Drought	10
At1g62770		Mt5g012000, Mt3g008840	1.00E-40 , 1.00E-39	Multiple homolog	IPEI	Invertase / pectin methylesterase inhibitor family protein	GO14	Drought	18
At1g62810		Mt3g080500	0	Specific	CAO	Copper amine oxidase	GO18	cold	18
At1g62820		Mt5g011850	7e-80	Specific	CAM	Calmodulin	GO4	Drought	TAIR
At1g63030		Mt1g101600	1e-51	Multiple homolog	DDF2	Dwarf and delayed flowering 2, Dehydration-responsive element-binding protein 1E	GO3	ABS	15
At1g63460.1		Mt8g098400	2e-86	Specific	GPX8	Glutathione Peroxidase 8	GO1	Salinity	13
At1g63900		Mt1g089960	2e-57	Multiple	ZF	Zinc finger protein	GO18	ABS	7
At1g63940.4		Mt4g127100	0.17	Low E, Uncertain	MDAR1	Monodehydroascorbate Reductase	GO6	Drought, heat	13
At1g64140		Mt2g098060	1e-05	Low E, Uncertain	LORI	Similar to putative disease resistance protein	GO6	Drought	10
At1g64230		Mt5g075580, Mt7g116940, Mt3g062450	2.00E-100, 3.00E-100, 7.00E-100		UBC28	Ubiquitin-conjugating enzyme	GO8	Drought, heat	18
At1g64550		Mt3g080970	0	Unique	GCN3	ABC transporter protein	GO2	Drought, heat	10
At1g64660		Mt3g080850	0	Unique	MGL	Met/cystathionine gamma lyase	GO8	cold, mannitol, NaCl	10
At1g64780		Mt1g079760	0	Specific but multiple	AMT	Ammonium transporter	GO2	Drought	1
At1g65040		Mt5g007710, Mt4g077800, Mt4g077710	0	Specific but multiple	ZF	zinc finger protein	GO3	cold, mannitol, NaCl	AtGI
At1g65390		Mt4g083970	1e-31	Less specific	ATPP2-A5	Transmembrane receptor	GO18	Drought, heat	1
At1g65660		Mt1g089490	0.1	Low E, Uncertain	SMP1	Step II splicing factor	GO16	ABS	10
At1g65980.1		Mt6g087990	3e-74	Unique	PrxR	Peroxiredoxin	GO1	Salinity	13
At1g66280		Mt6g078450	1e-131	Specific but multiple	BG	β-glucosidase	GO6	heat, salt stress, abscisic acid stimulus	7
At1g66340		Mt4g031150	0	Very specific but two genes	EIN1	Ethylene response 1	GO5	salt stress	TAIR
At1g66350		Mt7g027250	3e-76	Specific	RGL1	RGA-like 1	GO3	Drought	TAIR
At1g66400		AC233676_5.1	2e-42	Multiple homolog	CaM	Calmodulin-related protein	GO4	ABA, drought	18
At1g66550		Mt2g075700	6e-21	Less specific	WRKY67	WRKY 67 transcription factor	GO3	Drought	14
At1g66910		Mt6g083760	1e-120	Multiple	RPK	Receptor serine/threonine kinase	GO4	Drought	18
At1g67090		Mt6g018310	1e-90	Multiple	RBCS1A	Ribulose-1,5-bisphophate carboxylase / oxygenase small subunit	GO12	cold	18
At1g67280		Mt8g102980	0	Specific		Lactoylglutathione lyase	GO18	Drought, heat	TAIR
At1g67360		Mt3g085370	2e-69	Specific	REF	Stress-related protein	GO17	Salt, drought	10
At1g68090		Mt8g107640	1e-114	Specific	ANN5	Annexin 5, calcium ion binding	GO18	Drought	17
At1g68290		Mt1g110510	1e-112	Multiple homolog	BiN	Bifunctional nuclease	GO10	Drought	18
At1g68440		Mt5g056480	2e-22	Unique	N/A	Unknown protein	GO18	Drought	18
At1g68750		Mt1g094000	0	Specific	PPC4	Phosphoenolpyruvate carboxylase 4	GO11	ABA, drought	18
At1g69260		Mt3g025970	1e-19	Less specific	ABI5BP	ABI5 binding protein	GO4	Drought/dehydration	14
At1g69410		Mt4g130910	1e-89	Multiple	EIF-5A	Eukaryotic translation initiation factor 5A	GO15	ABA, drought	4
At1g69480		Mt7g011330	0	Very specific	ERD1	ERD1/XPR1/SYG1 family protein	GO18	Drought	14
At1g69490		Mt5g041940	2e-101	Specific	ANAC029	NAC domain protein	GO3	water deprivation	18
At1g69600		Mt7g010300	5e-48	Less specific	ZFHD1	Zinc finger homeodomain transcriptional factor family	GO3	Drought	TAIR
At1g69780		Mt5g039000	1e-84	Specific	HB13	Homeobox-leucine zipper protein	GO3	salt stress, abscisic acid stimulus	18
At1g70000		Mt5g037080	2e-61	Specific	N/A	Similar to myb family transcription factor	GO3	Drought, heat	TAIR
At1g70300		Mt5g034500	0	Specific	KUP6	Potassium transporter	GO2	Drought, heat	10
At1g71000		Mt7g112360, Mt8g022310	3.00E-31, 3.00E-24	Multiple homolog	DnaJ	Heat shock protein DnaJ	GO6	salt stress, abscisic acid stimulus	10
At1g71030		Mt5g079670	7e-36	Specific but multiple	MYBL2	Arabidopsis MYB-like 2	GO3	Salinity	TAIR
At1g71270		Mt1g079770	0	Unique	POK	ARE1-like protein	GO16	Drought	7
At1g71695		Mt2g029820	2e-71	Less specific	PER12	Peroxidase	GO6	abscisic acid stimulus	18
At1g71930		Mt5g021710	3e-77	Specific	VND7	Vascular related NAC-domain protein 7	GO3	ROS, cold, water deprivation, salt stress	TAIR
At1g72520		Mt8g020970	0	Specific but multiple	LOX	Lipoxygenase	GO9	salt stress	3
At1g72650		Mt8g020330	2e-93	Specific	TRFL6	TRF-like 6	GO3	Drought, heat	TAIR
At1g72660		Mt8g020210	0	Unique	GBP	GTP-binding protein, putative	GO18	ABA, drought	10
At1g72770		Mt3g104710	1e-118	Specific	PP2C	Protein phosphatase 2C	GO4	Drought, heat	14
At1g73040		Mt2g100590	3e-64	Specific	JLN	Jacalin lectin family protein	GO18	Drought/dehydration	10
At1g73260		Mt6g078140, Mt6g078120	5e-20	Less specific	DEFL	Trypsin inhibitor, putative	GO6	water deprivation	4
At1g73330		Mt6g059730	1e-06	Low E, uncertain	DR4	Drought-repressed 4	GO6	Salinity	TAIR
At1g73480		Mt3g109870	6e-70	Specific	LPL	Lysophospholipase homolog	GO18	Drought, heat	7
At1g73680		Mt8g106800	0	Unique	DOX2	Pathogen-responsive alpha-dioxygenase	GO6	Drought, heat	10
At1g74310		Mt6g013660, Mt3g106160, Mt7g012820	0	Specific but multiple	HSP101	Heat shock protein 101	GO6	abiotic stress, ABA	10
At1g74450		Mt1g098700	7e-128	Unique	N/A	Unknown protein	GO18	Drought	12
At1g74730		Mt3g026020	5e-07	Low E, Uncertain	N/A	Unknown protein	GO18	salt stress, abscisic acid stimulus	18
At1g74840		Mt5g037080	4e-33	Less specific	MYB	Myb family transcription factor	GO3	Salt	TAIR
At1g74920		Mt4g106510	0	Unique	BADH	Betaine-aldehyde dehydrogenase	GO15	Drought	AtGI
At1g75180		Mt4g070020	2e-76	Unique	N/A	Unknown protein	GO18	Drought	18
At1g75250		Mt7g089210	5e-32	Multiple	MYB	Myb-related transcription factor	GO3	ABS	18
At1g75270.1		Mt5g090910	0.22	Low E, Uncertain	DHAR2	Dehydroascorbate Reductase	GO5	Drought	13
At1g76180		Mt3g117190	0.078	Low E, Uncertain	ERD14	Early responsive to dehydration 14	GO6	ROS	AtGI
At1g76650		Mt6g023460	1e-39	Less specific	CaEF	Calcium-binding EF-hand protein	GO4	ABS	3
At1g76760.1	11	Mt1g098660	6e-56	Specific	ATY1	Thioredoxins (Trx)	GO1	Drought	13
At1g77000		Mt7g112570	8e-22	Less specific	FBL5	F-box protein family	GO8	Drought	18
At1g77120		Mt3g089940, Mt3g089970	0	Specific	ADH1	Alcohol dehydrogenase 1	GO6	ABS, cold	18
At1g77370.1		Mt5g021090	2e-43	Specific	GLR	Glutaredoxin	GO1	abiotic stress, ABA, heat	13
At1g77450		Mt3g088110	6e-104	Multiple homolog	ANAC032	Arabidopsis NAC domian containing protein 32	GO3	stresses	12
At1g77490		Mt3g088160	0	Unique	tAPX	L-ascorbate peroxidase, thylakoid-bound	GO1	Drought, heat	AtGI
At1g77510		Mt2g094180	5e-50	Specific	ATPDIL1-2	Protein disulfide isomerase	GO1	Drought/dehydration	10
At1g77840		Mt7g082940	4e-141	Unique	EIF-5	Eukaryotic translation initiation factor 5	GO3	Salinity	4
At1g78070		CU651566_11.1	0	Specific	WD-40	WD-40 REPEAT FAMILY PROTEIN	GO18	Cold, osmotic stress, slat stress	7
At1g78090		Mt5g063080	1e-130	Multiple loci in Mt	TPP	Trehalose-6-phosphate phosphatase	GO11	Drought	AtGI
At1g78290		N/A	N/A	N/A	SNRK2	Serine / threonine protein kinase	GO4	Cold	TAIR
At1g78510		Mt8g078070	6e-24	Less specific	SPS1	Similar to prenyltransferase	GO15	Water deprivation	1
At1g78580		Mt8g087930, Mt8g087910	0	Specific	TPS1	Trehalose-6-phosphate synthase	GO11	Drought, heat	AtGI
At1g78670		Mt2g075760	4e-136	Specific	GGH3	Gamma glutamyl hydrolase 3	GO8	Drought	10
At1g78780		Mt8g058680, Mt8g058350	2e-83	Specific but multiple	PRFP	Pathogenesis-related family protein	GO18	cold, mannitol, NaCl	18
At1g78860		Mt2g076590, Mt2g076490	1.00E-123, 3.00E-113	Specific	CLL	Curculin-like lectin family protein	GO18	Drought	1
At1g79080		Mt1g080110	4e-88	Specific	PPRP	Pentatricopeptide (PPR) repeat-containing protein	GO18	cold, mannitol, NaCl	18
At1g79270		Mt2g063460	4e-111	Specific	ECT8	Evolutionary conserved C-terminal region 8	GO18	cold, mannitol, NaCl	1
At1g79520		Mt3g080090	1e-152	Specific	CEP	Cation efflux family protein	GO2	Drought, heat	1
At1g79560		Mt8g056860	0	Unique	FTSH12	FtsH protease	GO8	Drought, heat	10
At1g80110		Mt1g079380	8e-61	Less specific	ATPP2-B11	Similar to PP2 lectin polypeptide	GO18	Drought/dehydration	10
At1g80160		Mt2g103490	4e-74	Specific	GOASE	Glyoxalase I family protein	GO11	Drought	4
At1g80490		Mt2g104140, Mt4g009840	0	Multiple homolog	TPR1	Topless-related 1	GO18	cold	18
At1g80820		Mt4g006940	3e-141	Specific	CCR2	Cinnamoyl-CoA reductase	GO7	ROS, biotic stress, hormones	TAIR
At1g80840		Mt4g007060	2e-56	Multiple homolog	WRKY40	WRKY40 transcription factor	GO3	Drought/dehydration	3
At2g01020		N/A			5.8RR	5.8S ribosomal RNA	GO8	Drought/dehydration	4
At2g01030		NA			26SR	26S ribosomal RNA	GO8	Drought	4
At2g01260		Mt1g110070	2e-94	Specific	N/A	Unknown protein	GO18	Cold	18
At2g01500		Mt8g107210	4e-25	Specific but multiple	PFS2	Pretty few seeds 2	GO3	salt stress, abscisic acid stimulus	TAIR
At2g01570		Mt7g027250	8e-68	Specific	RGA1	Repressor of GA1-3	GO3	water deprivation	TAIR
At2g01830		Mt8g106150	0	Very specific	AHK4	Histidine kinase	GO4	Salinity	TAIR
At2g01890		AC146550_1005.1, Mt8g107620	2.00E-138, 2.00E-137	Specific	PAP8	Purple acid phosphatase 8	GO17	Salinity	6
At2g01980		Mt2g038400	3e-32	Unique	SOS1	Na+ / H+ antiporter	GO2	Drought	7
At2g02000		Mt3g064740	0	Specific	GAD3	Glutamate decarboxylase 3	GO8	Drought	18
At2g02010		Mt3g064740	0	Specific	GAD4	Glutamate decarboxylase 4	GO8	Cold	18
At2g02100		Mt8g070770	3e-16	Multiple homolog	LCR69	Gamma-thionins family, low-molecular-wieght cysteine-rich 69	GO6	ABA, drought	2
At2g02710		Mt5g038420	2e-94	Specific	PACMP	PAC motif containing	GO4	cold, mannitol, NaCl	14
At2g02810		Mt5g038900	0	Unique	UTR1	UDP-galactose transporter	GO18	Drought	1
At2g02990		Mt5g040940	7e-109	Multiple homolog	RNS1	S-like ribonuclease	GO14	cold, mannitol, NaCl	18
At2g03260		Mt7g011330	0	Specific	ERD1	ERD1/XPR1/SYG1 family protein	GO18	Cold	1
At2g03350		Mt5g043190	3e-76	Multiple homolog	N/A	Unknown protein	GO18	ABA, drought	1
At2g03760		Mt8g066220	4e-96	Specific	FST	Flavonol sulfotransferases	GO6	Drought, heat	14
At2g04030		Mt5g097320	0	Specific	HSP	Heat shock protein-like	GO6	Drought	10
At2g04240		Mt3g082510	2e-47	Less specific	RZF	RING zinc finger protein	GO3	Drought	18
At2g04700		Mt6g008180	3e-16	Specific	FTR	Ferredoxin-thioredoxin reductase catalytic chain, chloroplast precursor	GO2	Cold	18
At2g05380		Mt5g084330	0.022	Low E, Uncertain	GRP3S	Glycine-rich protein 3 short isoform	GO17	desiccation, abscisic acid stimulus	1
At2g05520		Mt5g084330	0.38	Low E, Uncertain	GRP-3	Glycine-rich protein 3	GO18	Drought	TAIR
At2g07739		Mt4g006080	3e-62	Specific	N/A	Unknown protein	GO18	Drought, heat	18
At2g07750		AC233680_24.1	2e-66	Specific	RH22	DEAD box RNA helicase	GO18	cold	10
At2g13950		Mt7g093330	1e-08	Low E, Uncertain		DC1 domain-containing protein	GO18	Drought, heat	TAIR
At2g14120		Mt2g009690	0	Specific but multiple	ADL2B	Dynamin-like protein	GO16	DRE, ABRE promoter analysis	10
At2g15320		Mt5g021290	9e-34	Less specific	LRRP	Leucine-rich repeat family protein	GO3	Drought, heat	2
At2g15480		Mt8g066610	2e-153	Very specific	UGT73B5	Glucosyltransferase, putative	GO11	ABS	10
At2g15570.1		Mt4g085880	7e-49	Multple homolog	ATHM3	Thioredoxins (Trx)	GO1	Drought	13
At2g15620		Mt4g086020	0	Unique	NIR1	Ferredoxin-nitrite reductase	GO15	Drought	18
At2g15680		Mt4g086260	2e-69	Specific	CaM	Calmodulin-like protein	GO4	Drought, heat	18
At2g15880		Mt3g100950	3e-158	Multple homolog	LRRP	Related to disease resistance Pro-rich	GO18	Drought, salt, cold	10
At2g15970		Mt4g068520	8e-74	Specific	COR413-PM1	Cold regulated 413 plasma membrane 1	GO6	Drought	8
At2g16230		Mt3g116510	0	Specific	B13G	Beta-1,3-glucanase	GO6	Drought	18
At2g16390		Mt7g026650	1e-66	Less specific	DRD1	SNF2 domain-containing protein	GO10	oxidative stress, salt stress	AtGI
At2g16500		Mt4g071940	0	Very specific	ADC1	Arginine decarboxylase 1	GO17	salt stress, abscisic acid stimulus	TAIR
At2g16720		Mt4g073420	3e-89	Specific but multiple	MYB7	Myb domain protein 7	GO3	Drought, heat	TAIR
At2g16890		Mt8g066610	1e-27	Multple homolog	GT	Glucosyltransferase, putative	GO11	water deprivation, osmotic stress	10
At2g17820		Mt5g022470	0	Very specific	AHK1	Histidine kinase	GO4	cold, mannitol, NaCl	TAIR
At2g17840		Mt5g022450	1e-161	Specific	ERD7	senescence / dehydration-associated protein-related	GO6	Drought	1
At2g17880		Mt5g022130	2e-32	Less specific	DnaJ	DnaJ heat shock protein	GO8	Drought, heat	18
At2g18050		Mt5g021730	8e-26	Specific	HisH1	Histone H1	GO15	Cold	10
At2g18260		Mt5g020670	3e-82	Specific	SYP112	Syntaxin 112	GO18	cold	TAIR
At2g18790		Mt2g034040	0	Specific	PHYB	Phytochrome B	GO16	Salinity	TAIR
At2g18960		Mt2g039940	0	Unique	AHA1	Plasma membrane proton ATPase	GO6	Drought	7
At2g19070		Mt4g127650, Mt4g097090	2.00E-156, 5.00E-141	Specific	ABT	Anthranilate N-benzoyltransferase	GO18	cold, salt stress, abscisic acid stimulus	18
At2g19450		Mt2g039940	0	Very specific	DGAT	Triacylglycerol biosynthesis defect 1	GO9	Cold	TAIR
At2g19520		Mt2g039250	0	Specific	MSI4	WD-40 repeat protein	GO16	cold, mannitol, NaCl	AtGI
At2g19590		Mt6g092620	2e-138	Specific	ACCO	1-aminocyclopropane-1-carboxylate oxidase	GO5	Salinity	1
At2g19860		Mt8g102460	0	Specific	HXK2	Hexokinase 2	GO11	Drought	1
At2g19940		Mt1g012540	0	Unique	AGPR	N-acetyl-gamma-glutamyl-phosphate reductase	GO8	Salinity	18
At2g20210		Mt7g099450	2e-58	Specific	LRRP	Leucine-rich repeat family protein	GO18	ABS	6
At2g20270.1		Mt3g077570, Mt3g077560	3.00E-21, 2.00E-19	Less specific	GLR	Glutaredoxin	GO1	Drought, heat	13
At2g20330		Mt7g098900	0	Unique	WD40	WD-40 repeat protein	GO18	Drought, heat	10
At2g20560		Mt2g014470	2e-157	Specific but multiple	HSP	Heat shock protein	GO6	Salinity	10
At2g21330		Mt4g071860, Mt4g071880	0	Specific but multiple	FBPA	Fructose bisphosphate aldolase-like protein	GO11	Salinity	7
At2g21410		Mt4g071070	0	Unique	VPA	vacuolar proton-ATPase subunit, putative	GO2	Drought	7
At2g21490		Mt5g016510	1e-70	Specific	DRP	Dehydrin-like protein	GO6	Drought, heat	18
At2g21590		Mt4g070430	0	Specific	APL4	ADP-glucose pyrophosphorylase, putative	GO11	Drought	10
At2g21620		Mt3g116830	3e-78	Unique	USP	Universal stress protein (USP) family protein	GO6	Cold	AtGI
At2g21660		Mt4g070190	3e-46	Multiple homolog	AtGRP7	Glycine-rich RNA-binding protein	GO6	Drought	2
At2g22170		Mt3g087510, Mt3g087490	9.00E-72, 6.00E-66	specific	DRP	Dehydration stress-induced protein	GO6	Salinity	AtGI
At2g22240		Mt3g087590, Mt8g091320	0	specific	IPS 2	Myo-inositol 1-phosphate synthase	GO15	Salinity	7
At2g22270		Mt3g087250	5e-47	specific	N/A	Unknown protein	GO18	Drought	6
At2g22500		Mt8g068890, Mt5g032420	2.00E-133, 1.00E-128	specific	DCCP	Dicarboxylate carrier protein, mitochondria substrate carrier family protein	GO2	Drought	18
At2g22540		Mt5g032520	4e-82	specific	SVP	Short vegetative phase protein	GO3	Drought	18
At2g22900		Mt5g015260, Mt4g097240	2.00E-171, 2.00E-152	specific	GMA12	Galactomannan galactosyltransferase	GO13	cold	18
At2g23120		Mt8g083390, Mt8g081540, Mt4g095330	6e-08	Uncertain	N/A	Unknown protein	GO18	Drought	2
At2g23170		Mt5g016320, Mt5g016310, Mt2g081860	0	Multiple loci in Mt	GH3.3	Auxin-responsive GH3-like protein	GO5	salt stress	18
At2g23290		Mt5g016510	1e-70	Specific	MYB70	Myb domain protein 70	GO3	Drought	TAIR
At2g23340		Mt5g016750	4e-48	Multiple	DREB	Dehydration responsive element binding protein	GO3	ROS	18
At2g23810		Mt4g061010	4e-63	Specific	TET8	Senescence-associated protein	GO14	cold, salinity	3
At2g24040		Mt4g130670	4e-39	Specific	N/A	hydrophobic protein	GO18	Drought	TAIR
At2g24520		Mt3g108800, Mt4g127710	0	Specific	AHA5	H+-transportin ATPase 5, plasma membrane	GO2	cold, mannitol, NaCl	18
At2g24540		Mt3g108860	2e-80	Specific	AFR	Kelch repeat-containing F-box family protein	GO18	Salinity	1
At2g24580		Mt3g108990, Mt3g109010	6.00E-169, 1.00E-160	Specific	SO	Sarcosine oxidase family protein	GO15	Salinity	6
At2g24850		Mt8g061360	6e-120	Specific	TAT3	Tyrosine aminotransferase 3	GO8	ABS	7
At2g25080.1	1	Mt1g014210	8e-99	Specific	GPX1	Glutathione Peroxidase 1	GO1	Cold	13
At2g25110		Mt3g106130	2e-117	Unique	SDF2	MIR domain-containing protein	GO17	Drought/dehydration	1
At2g25450		Mt2g069210	1e-119	Multiple homolog	ODO	3-oxoglutarate-dependent dioxygenase	GO5	Salinity	4
At2g25500		Mt8g077570	2e-36	Specific	MAF	Similar to MAF-family protein	GO18	Cold	6
At2g25930		Mt3g103970	7e-70	Specific	ELF3	Early flowering 3	GO3	Salinity	TAIR
At2g26080		Mt1g016230	0	Unique	GDH	Glycine dehydrogenase	GO8	Drought, heat	7
At2g26150		Mt3g104550	4e-103	Specific	HSFA2	Heat shock transcription factor-like protein	GO3	ROS, salinity, ABA, water deprivation	10
At2g26190		Mt2g039910	7e-169	Specific	CaMP	Calmodulin-binding protein	GO4	salt stress	3
At2g26430		Mt5g055170, Mt5g010140	3.00E-162, 7.00E-161		RCY1	Arginine-rich cycin 1	GO18	Drought	TAIR
At2g26500		Mt1g105280	1.5	Low E, Uncertain	PETM	Cytochrome b6f complex subunit	GO2	salt stress	18
At2g26650		Mt4g113530	0	Very specific	AKT1	K transporter 1	GO2	Salinity	TAIR
At2g26690		Mt4g114340	0	Specific	NTP2	nitrate transporter, putative	GO2	abiotic stimulus, abscisic acid, cold, drought, high salt	7
At2g26980		Mt5g088350	0	Specific but multiple	CIPK3	CBL-interacting protein kinase 3	GO4	abscisic acid stimulus	TAIR
At2g27150		Mt5g087390, Mt5g087410	0	Fairly specific	AAO3	Abscisic-aldehyde oxidase 3	GO6	Cold	AtGI
At2g27310		Mt2g086920	3e-53	Less specific, Extensin-like protein	FBP	F-BOX FAMILY PROTEIN	GO18	cold, mannitol, NaCl	1
At2g27690		Mt4g054920	0	Specific	CYP94C1	Cytochrome P450-like protein family 94 subfamily C	GO6	ABS, ROS	1
At2g28190		Mt4g057240	7e-86	Multiple homolog	CSD2	Superoxide dismutase [Cu-Zn]	GO1	Drought	3
At2g28305		Mt4g058740, Mt1g064260	7.00E-110, 1.00E-109	Specific	LOG1	Lonely guy 1	GO18	Cold	18
At2g28320		Mt2g094620	0	Specific	PHDP	Pleckstrin homology domain-containing protein	GO18	ABA, drought	1
At2g28400		Mt2g094410	4e-25	Multiple	N/A	Unknown protein	GO18	cold, mannitol, NaCl	14
At2g28470		Mt2g094060, Mt4g059680	0	Multiple	BGAL8	Beta-D-galactosidase	GO11	Cold	1
At2g28550		Mt4g061200	8e-87	Multiple	TOE1	AP2 domain transcription factor	GO3	cold, mannitol, NaCl	1
At2g28570		Mt8g106280	0.1	Low E, Uncertain	N/A	Unknown protein	GO18	cold, mannitol, NaCl	1
At2g28690		Mt4g057470	6e-33	Less specific	NTP	Nitrate transporter, putative	GO2	cold	1
At2g28900		Mt2g034550	4e-13	Low E, Uncertain	OEP16	Outer encelope protein 16	GO18	cold, mannitol, NaCl	2
At2g28960		Mt8g014700	0	specific	RLK	Receptor-like protein kinase	GO4	cold, mannitol, NaCl	1
At2g28970		Mt8g014700	1e-173	Specific but multiple	RLK	Receptor-like protein kinase	GO4	Drought, heat	1
At2g29300		Mt7g071680	5e-12	less specific	TR	Tropinone reductase, putative	GO17	Salinity	10
At2g29340		Mt7g071680	3e-16	less specific	SDR	Short-chain dehydrogenase / reductase family protein	GO17	Drought	7
At2g29380		Mt5g080680	2e-104	Specific	PP2C	Protein phosphatase 2C	GO4	Salinity	18
At2g29450		Mt8g087410	4e-53	Multiple homolog	GSTU5	Glutathione S-transferase	GO1	stresses, water deprivation, salt stress,	7
At2g29480		Mt8g087410	1e-57	Multiple homolog	GSTU2	Glutathione S-transferase	GO1	stresses	AtGI
At2g29490		Mt8g087420	1e-59	Multiple homolog	GSTU1	Glutathione S-transferase	GO1	Drought, heat	AtGI
At2g29500		Mt6g061850	1e-62	Multiple homolog	HSP17.6B-CI	Small heat shock protein	GO6	Drought, heat	10
At2g29630		Mt5g087420	0.17	Low E, Uncertain	thiC	Thiamin biosynthesis protein, putative	GO15	Salinity	10
At2g29980		Mt4g015630	0	Specific	FAD3	Omega-3 fatty acid desaturase	GO9	Drought/dehydration	6
At2g30140		Mt3g031400, Mt5g075440	2e-117	Specific	UGT	UDP-glucoronosyl/UDP-glucosyl transferase family protein	GO15	cold, mannitol, NaCl	4
At2g30360		Mt5g075100	4e-154	Specific	CIPK11, SOS2	CBL-interacting serine/threonine-protein kinase 11, SOS2-like protein kinase	GO4	Drought	1
At2g30490		AC233660_8.1	0	Specific	C4H	Cinnamate-4-hydroxylse*	GO7	Salinity	18
At2g30540		Mt7g108200	4e-48	Specific	GLR	Glutaredoxin	GO1	Drought	6
At2g30570		Mt7g014700	0.46	Low E, Uncertain	PSBW	Photosystem II reaction center W protein-related	GO12	cold, mannitol, NaCl	18
At2g30590		Mt1g009380	1e-49	Specific	WRKY21	WRKY21 transcription factor	GO3	stresses, oxidative stress	1
At2g30860		Mt3g064700	9e-65	Specific	GSTF9	Glutathione S-transferase	GO1	water deprivation	AtGI
At2g30870		Mt5g090920	2e-82	Specific	ERD13	Early dehydration-induced gene ERD13 homologous to tobacco and maize glutathione S-transferases	GO1	Drought	TAIR
At2g31110		Mt4g079700	1e-153	Specific	TBL40	Trichome birefringence-like 40	GO18	salt stress	18
At2g31180		Mt1g043080	2e-71	Specific but multiple	MYB14	Myb domain protein 14	GO3	cold	TAIR
At2g31360		Mt4g010150	3e-102	Specific	ADS2	Delta 9 desaturase	GO9	Cold	2
At2g31380		Mt2g099010	7e-73	Specific	STH	Salt tolerance-like protein	GO3	bacterium, fungus, cold, ethylene, drought	1
At2g31570.1		Mt8g105630	4e-83	Specific	GPX2	Glutathione Peroxidase 2	GO1	cold, mannitol, NaCl	13
At2g31730		Mt4g087300	2e-41	Specific	ERP	Ethylene-responsive protein	GO3	cold, mannitol, NaCl	1
At2g31790		Mt8g088560	7e-118	Specific	GT	Glucosyltransferase, putative	GO11	Drought, heat	1
At2g32120		Mt5g006180	0	Very specific	HSP70T-2	70-kD Heat shock protein	GO6	Drought	10
At2g32260		Mt2g035810	3e-101	Unique	CPCT	Cholinephosphate cytidylyltransferase	GO9	cold, water deprivation, salt stress, ABA	18
At2g32273		N/A			MIR417	Micro RNA 417	GO15	Drought	TAIR
At2g32530		Mt2g087950	2e-170	Specific	CSLB3	Cellulose synthase-like B3	GO11	cold, mannitol, NaCl	18
At2g32800		Mt5g035910	8e-60	Multiple homolog	PK	Protein kinase	GO4	Drought, heat	1
At2g32920		Mt5g084930	5e-170	Unique	PDIL2-3	Disulfide isomerase-related protein	GO6	Salinity	10
At2g32950		Mt5g085250	0	Unique	COP1	Constitutive photomorphogenic	GO10	cold, mannitol, NaCl	7
At2g33210		Mt1g090140, Mt1g090130	0	Specific	HSP60	Mitochondrial chaperonin	GO6	ABS	1
At2g33270.1		Mt7g085310	3e-82	Specific	TRX	Thioredoxins	GO1	Drought/dehydration	13
At2g33380		AC233676_19.1	8e-50	Specific	RD20	Calcium-binding EF-hand protein, Responsive to dessication 20	GO4	Drought, heat	4
At2g33590		Mt4g009040	4e-124	Specific	CCR	Cinnamoyl-CoA reductase	GO7	ABS	10
At2g33740.1		Mt3g100630	5e-44	Unique	CUTA	Blue copper protein	GO6	Cold	13
At2g33830		Mt2g014240	3e-29	Multiple	DAAP	Dormancy / auxin associated family protein	GO18	cold, mannitol, NaCl	2
At2g34300		Mt3g096480, Mt8g093880, Mt5g021100	0	Multiple	DRP	Dehydration-responsive protein-related	GO6	Drought, heat	1
At2g34355		Mt2g100400	9e-166	Specific	NodL	Nodulin-like protein	GO18	cold	10
At2g35040		Mt3g013710, Mt5g095820	0	Unique		Aicraft/IMPHase bienzyme family protein	GO17	ABS, ROS	TAIR
At2g35300		Mt4g098480	5e-15	Unique	LEA4-2	LEA group 4, Late embryogenesis abundant group 1 domain-containing protein	GO16	Salinity	3
At2g35710		Mt5g012590	1e-24	Less specific	GGT	Glycogenin glucosyltransferase, putative	GO11	Drought	1
At2g35800		Mt1g095780	0	Unique	MCP	Mitochondrial substrate carrier protein	GO2	abiotic stress, ABA	18
At2g36270		Mt7g104480	3e-93	Specific	ABI5	bZIP transcription factor family protein / ABA-responsive element-binding protein	GO3	Cold	12
At2g36530		Mt6g060570	0	Unique	LOS2	Low expression of osmotically reponsive genes 2	GO6	ABS, ROS, freezing	TAIR
AT2G36640		Mt1g061730	2e-57	Specific	ECP63	LEA group 3, Embryonic cell protein 63	GO16	ABS, ROS	3
AT2G36690		Mt1g062110	5e-149	Very specific	OXR	Oxidoreductase family	GO17	salt stress	3
At2g36830		Mt4g063090	8e-134	Specific	GAMMA-TIP	Tonoplast intrinsic protein gamma	GO2	cold, mannitol, NaCl	TAIR
At2g37170		Mt7g101190	4e-134	Multiple homolog	PIP2B	Aquaporin (PIP2B)	GO2	Drought	1
At2g37180		Mt1g064230	2e-84	Multiple homolog	RD28-PIP	Aquaporin PIP2.3	GO2	Cold	AtGI
At2g37220		Mt1g064230	2e-84	Specific		29 kDa ribonucleoprotein	GO17	Salinity	TAIR
At2g37490		NA			N/A	Unknown protein	GO18	Salinity	1
At2g37510		Mt7g099940	2e-42	Specific	RBP	RNA-binding protein	GO17	salt stress	6
At2g37630		Mt7g061550	8e-103	Very specific	MYB91	Asymmetric leaves 1	GO3	Drought/dehydration	TAIR
At2g37760		Mt4g021350	2e-131	Specific	AKR	Aldo/keto reductase family	GO6	cold	4
At2g37970		Mt4g019130	2e-67	Specific	SOUL	SOUL heme-binding family protein	GO18	Salinity	1
At2g38110		Mt7g067380	0	Specific	GPAT6	Phospholipid/glycerol acyltransferase family	GO9	cold	7
At2g38170		Mt7g068380	4e-145	Specific	CAX1	Calcium exchanger, Cation exchanger 1	GO2	cold, mannitol, NaCl	AtGI
At2g38310		Mt7g070050	2e-73	Specific but multiple	N/A	Unknown protein	GO18	Drought	1
At2g38400		Mt7g072420, Mt8g091660	0	Specific	AGT3	Beta-Ala-pyruvate aminotransferase	GO8	ROS	18
At2g38470		Mt7g071120	1e-96	Multiple homolog	WRKY33	WRKY33 transcription factor	GO3	Drought, heat	3
At2g38530		Mt4g028180	6e-23	Less specific	LTP2	Lipid-transfer protein 2, nonspecific	GO2	Salt, drought	10
At2g38750		Mt8g038170	1e-99	Specific	ANN4	Annexin 4, calcium ion binding	GO6	cold, mannitol, NaCl	17
At2g38800		Mt3g020820	3e-60	Specific	CaMP	Calmodulin-binding protein	GO4	abiotic stress, ABA	1
At2g38820		Mt1g070970	4e-91	Specific	N/A	Unknown protein	GO18	water deprivation	12
At2g38880		Mt7g100650	2e-55	Specific	HAP3	Transcription factor from the nuclear factor Y family	GO3	cold, salinity	TAIR
At2g38905		Mt7g111380	2e-23	Less specific	N/A	hydrophobic protein	GO18	Salinity	TAIR
At2g39210		AC233660_6.1	0	Specific	NodL	Nodulin-like protein	GO18	Drought	7
At2g39420		Mt1g088470	2e-121	Specific	PL	Phospholipase	GO17	water deprivation, abscisic acid stimulus	18
At2g39550		Mt7g024540	9e-138	Very specific	GGB	Beta subunit of geranylgeranyl transferase (GGT-IB)	GO5	Drought	TAIR
At2g39730		Mt5g080450, Mt4g021210	0	Specific	RCA	Rubisco activase	GO12	heat, salt stress	18
At2g39770		Mt5g080770, Mt3g069070	0	Specific but two genes	CYT1	Cytokinesis defecitve 1	GO13	Salinity	TAIR
At2g39800		Mt5g082950	9e-34	Very specific	P5CS1	1-pyrroline-5-carboxylate synthetase A	GO8	DRE, ABRE promoter analysis	7
At2g39810		Mt5g012940	0	Unique	HOS1	High expression of osmotically responsive genes 1	GO6	Drought	2
At2g39890		Mt5g081630	0	Very specific	ProT1	Proline transporter 1	GO2	Cold	15
At2g40080		Mt3g070490	1e-29	Specific	ELF4	Early flowering 4	GO18	ROS, biotic stress	1
At2g40140		Mt5g082830	7e-170	Specific but multiple	ZFAR1	Zinc finger ankyrin repeat	GO3	ABA	3
At2g40220		Mt5g083340	8e-40	Less specific	ABI4	Abscisic acid-insensitive 4	GO3	Drought/dehydration	AtGI
At2g40300		Mt5g083170	7e-96	Specific	FER4	Ferritin 4	GO1	cold, mannitol, NaCl	4
At2g40330		Mt7g070050	9e-62	Specific but multiple	BETVI	Bet v I allergen family protein	GO18	Drought	1
At2g40340		Mt7g088620	5e-15	Less specific	DREB2C	Dehydration-responsive element-binding protein 2C	GO3	Drought, heat	AtGI
At2g40350		Mt5g083340	2e-40	Less specific	DREB2C	Dehydration-responsive element-binding protein 2C	GO3	Drought	10
At2g40490		Mt3g072330	0	Very specific	HEME2	Uroporphyrinogen decarboxylase	GO12	Drought/dehydration	18
At2g40840		Mt7g088740	0	Unique	DPE2	Disproportionating enzyme 2	GO11	cold, mannitol, NaCl	4
At2g40900		Mt8g041390	1e-86	Specific	MTN21	Nodulin MTN21 family protein	GO18	water deprivation, salt stress	1
At2g41010		Mt7g088620	5e-15	Low E	CAMBP25	Calmodulin binding protein	GO4	ROS	TAIR
At2g41100		Mt7g087640	2e-51	Multiple homolog	TCH3	Touch-responsive/calmodulin-related protein 3	GO6	Drought	3
At2g41380		Mt7g090180	2e-96	Specific	EMB	Embryo-abundant protein	GO18	Drought	18
At2g41429		NA			ERD15	Early responsive to dehydration 15	GO18	water deprivation	AtGI
At2g41430		Mt7g090630	4e-24	Fairly specific, Low E	ERD15	Hydrophilic protein	GO18	cold, mannitol, NaCl	TAIR
At2g41560		Mt4g043690, Mt4g043340	0	Multiple homolog	ACA4	Auto-inhibited Ca(2+)-ATPase, Calcium-ATPase	GO6	ABS	1
At2g41680.1		Mt5g024900	1e-92	Unique	Trx	NADPH-dependent thioredoxin reductase	GO1	Salinity	13
At2g41810		Mt4g039720	3e-146	Multiple homolog	N/A	Unknown protein	GO18	Drought	1
At2g42220		Mt7g092820	4e-85	Unique	RhoP	Rhodanese-like domain protein	GO18	Drought, heat	18
At2g42270		Mt2g064740	0	Specific	RNAH	ATP-dependent RNA helicase, putative	GO18	Drought, salt, cold	10
At2g42530		Mt2g014040	0.0009	Low E, Uncertain	COR15b	Cold-regulated protein COR15b, LEA	GO6	Drought, salt, cold	8
At2g42540		Mt5g044890	0.59	Low E, Uncertain	COR15a	Cold-regulated protein, COR15a, LEA	GO6	salt stress	8
At2g42600		Mt4g079860, Mt2g092930, Mt2g076670	0	Specific but multiple homologs	PPC2	phosphoenolpyruvate carboxylase 2	GO11	water deprivation	TAIR
At2g42620		Mt4g080020	0	Very specific	MAX2	F-box leucine-rich repeat family of proteins	GO14	Salinity	TAIR
At2g43020		Mt5g090300	0	Very specific	PAO2	Amine oxidase, putative	GO18	ABS, water deprivation	7
At2g43350.1		Mt8g105630	1e-79	Multiple homolog	GPX3	Glutathione Peroxidase 3	GO1	Drought/dehydration	13
At2g43510		Mt5g081290	0.34	Low E, Uncertain	DEFL	Trypsin inhibitor	GO6	Drought, heat	4
At2g43570		Mt2g099470	2e-74	Specific	CHI	Chitinase	GO6	Drought, heat	10
At2g43590		Mt2g099470	4e-96	Specific	CHI	Chitinase	GO6	ABS, ROS	10
At2g43620		Mt2g099470	2e-65	Specific	CHI	Chitinase	GO6	Drought	3
At2g43760		Mt3g041720	2e-79	Very specific	MPS	Molybdopterin synthase large subunit	GO15	cold, biotic stimulus, fungus, salt, ABA	18
At2g43790		Mt4g087620	0	Specific	MPK6	Mitogen-activated protein kinase	GO4	abiotic stress, ABA	AtGI
At2g44660		Mt5g077540	0	Unique	ALG6, ALG8	Glycosyltransferase family	GO15	Drought	12
At2g44830		Mt2g027240	1e-179	Specific	PtoPK	AvrPto-dependent Pto-interacting protein 3	GO4	Cold	18
At2g44840		Mt4g100380	3e-43	Multiple homolog	ERF13	Ethylene-responsive element-binding protein 13	GO3	Drought	1
At2g45120		Mt4g100860	2e-35	Multiple homolog	ZF	C2H2-type zinc finger protein	GO3	cold, mannitol, NaCl	18
At2g45180		Mt4g101260	1e-42	Multiple homolog	PILTP	Protease inhibitor / seed storage / lipid transfer protein family protein	GO18	Drought	1
At2g45190		Mt4g101660	1e-59	Specific	YAB1	YABBY-like transcription factor	GO3	Salinity	18
At2g45290		Mt1g116120, Mt5g059410, Mt4g024630	0	Specific	TKL	Transketolase	GO11	salt stress, abscisic acid stimulus	7
At2g45640		AC233100_4.1	8e-53	Unique	SAP18	SIN3 associated polypeptide P18	GO6	Drought	TAIR
At2g45660		Mt7g075870	9e-66	Specific but multiple	AGL20	MADS-box transcription factor	GO3	cold, mannitol, NaCl	18
At2g45820		AC235674_1.1, Mt7g076730	2.00E-25, 2.00E-23	Multiple	RMRN	Remorin	GO17	water deprivation, salt stress	1
At2g45960		Mt5g010150	2e-161	Specific but multiple	PIP1B	plasma membrane intrinsic protein subfamily PIP1	GO2	Drought	TAIR
At2g46210		Mt8g056100	0	Specific	D8SD	Delta-8 sphingolipid desaturase	GO9	heat	18
At2g46240		AC233577_25.1	2e-51	Unique	BAG6	BCL-2-associated athanogene 6	GO14	Drought, heat	TAIR
At2g46270		Mt7g116890	4e-95	Specific	GBF3	G-box binding bZIP transcription factor	GO3	Drought	10
At2g46590		Mt2g093220	2e-31	Multiple	DAG2	DOF zinc finger protein, DOF affecting germination 2	GO3	Drought, heat	18
At2g46680		Mt1g026140	9e-54	Less specific	ATHB-7	Homeobox leucine zipper protein	GO3	Cold	10
At2g46790		Mt3g092780	8e-41	Less specific	PRR9	Pseudo-response regulatro 9	GO18	Cold	1
At2g46830		Mt7g118330	8e-66	Less specific	CCA1	MYB transcription factor	GO3	Drought	1
At2g47170		Mt1g086480, Mt6g005820	5e-120	Multiple	ARF1A1C	ADP-ribosylation factor 1	GO18	Drought, heat	18
At2g47180		Mt7g109920	0	Specific	GOLS1	Galactinol synthase	GO11	Drought, salt	10
At2g47190		Mt2g033170	2e-76	Multiple	MYB2	Myb family transcription factor	GO3	Drought, heat	AtGI
At2g47470		Mt1g087520	8e-137	Specific	PDIL2-1	Disulfide-isomerase-related protein	GO6	cold	10
At2g47730	7	Mt1g026140	9e-54	Specific	GSTF8	Glutathione S-transferase 8	GO1	cold, mannitol, NaCl	TAIR
At2g47770		Mt7g108650	7e-26	Unique	BDR	Benzodiazepine receptor-related	GO18	water deprivation	1
At2g47800		Mt1g088680	0	Multiple	MRP4	ATPase transporter involved in multidrug transport	GO2	ABS, salt stress	TAIR
At2g47880.1		Mt7g108200	3e-49	Less specific	GLR	Glutaredoxin	GO1	Salinity	13
At2g48150	9	Mt1g072570	9e-70	Multiple	GPX4	Glutathione peroxidase 4	GO1	cold, mannitol, NaCl	6
At2g48270		NA			GBF	G-box binding bZIP transcription factor	GO3	Salinity	1
At3g01190		Mt2g088770	1e-99	Specific	PER27	Peroxidase	GO1	Drought	1
At3g01210		Mt7g010100	7e-61	Specific	RRMP	RNA recognition motif containing protein	GO10	ROS	18
At3g01290		Mt4g107810, Mt4g107760	1e-134	specific	B7P	Band 7 protein, hypersensitive induced	GO8	Drought/dehydration	3
At3g01420		Mt8g106800	0	Unique	DOX1	Pathogen-responsive alpha-dioxygenase	GO16	Drought	4
At3g01470		Mt4g107650	5e-42	specific	ATHB1	Homeobox-leucine zipper protein	GO3	cold	18
At3g01500		Mt6g006990	8e-123	Specific	CA1	Carbonic anhydrase 1	GO15	ABA, drought	TAIR
At3g01650		Mt6g021730, Mt7g033100, Mt3g086520	0	specific	COP	Copine related	GO18	Drought	14
At3g02040		Mt7g083410	2e-73	Unique	SRG3	Glycerophosphodiester phosphodiesterase, Senescence-related gene 3	GO15	salt stress, abscisic acid stimulus	18
At3g02140		Mt3g025970	7e-07	Less specific	TMAC2	Two or more abres-containing gene 2	GO18	ABS, ROS, water deprivation	TAIR
At3g02480		Mt2g059260	7e-12	Low E, Uncertain	KIN1	Abscisic acid-responsive, cold-induced protein kin1	GO6	salt stress, abscisic acid stimulus	3
At3g03450		Mt7g027250	9e-70	Specific	RGL2	RGA-like 2	GO3	Drought, heat	TAIR
At3g03470		Mt2g010330	2e-152	Specific	CYP89A9	Cytochrome P450-like protein family 89 subfamily A	GO6	abiotic stress, ABA	10
At3g03680		Mt4g107850	0	Multiple	C2P	C2 domain-containing protein	GO18	Salinity	12
At3g03780		Mt7g086300, Mt3g079640	0	Specific	ATMS2	Met synthase-like protein	GO8	Drought	7
At3g03870		Mt6g029250	7e-19	Less specific	N/A	Unknown protein	GO18	Drought, heat	18
At3g04000		AC233662_54.1	9e-90	Specific	SDR	Short-chain type dehydrogenase / reductase	GO17	Drought	10
At3g04030		Mt2g086450	2e-82	Less specific	MYB	Myb family transcription factor	GO3	Drought	18
At3g04240		Mt1g079510	0	Unique	SEC	UDP-N-acetylglucosamine--peptide N-acetylglucosaminyltransferase	GO8	Cold	18
At3g04880		Mt7g114750	2e-129	Unique	DRT102	DNA-damage-repair/toleration 102	GO10	Drought, heat	TAIR
At3g05640		Mt7g112490	8e-169	Specific	PP2C	Protein phosphatase 2C	GO4	Drought, heat	10
At3g05650		Mt5g087320	1e-112	Specific	DiRP	Disease resistance protein, putative	GO6	Drought, heat	10
At3g05660		Mt5g086530	2e-147	Specific	DiRP	Kinase/ protein binding	GO6	Water deprivation	10
At3g05700		Mt1g083780	2e-61	Specific	Fb2	similar to fiber protein Fb2	GO6	cold, salinity	TAIR
At3g05880		Mt7g111380	2e-26	Multiple	RCI2A	Rare-cold-inducible 2A	GO6	Salt, cold	TAIR
At3g05890		Mt7g111350, Mt7g111450, Mt7g111380	2e-27	Multiple	RCI2B	Hydrophobic rare cold-inducible protein / low temperature and salt responsive protein	GO6	water deprivation, heat, salt stress	AtGI
At3g06010		Mt5g005840, Mt1g105050	0	Specific but two genes	CHR12	SNF2/Brahma-type chromatin-remodeling protein	GO15	ABS	TAIR
At3g06050.1		Mt6g087990	4e-32	Fairly specific	PrxIIF	Perociredoxin IIF	GO1	Drought, heat	13
At3g06400		Mt2g020000	0	Unique	CHR11	Chromatin-remodeling protein 11	GO2	salt stress	10
At3g06490		Mt2g033170	7e-79	Specific but multiple	MYB108	Myb domain protein 108	GO3	ABA, drought	TAIR
At3g06500		Mt1g084610	0	specific	BF	b-Fructofuranosidase	GO11	Salinity	14
At3g06660		Mt7g109620, Mt4g121970	2e-42	specific	PAPA	PAPA-1-like family protein	GO18	ABS	7
At3g06730.1		Mt3g014240	3e-50	Specific	TRX	Thioredoxins	GO1	water deprivation	13
At3g06760		Mt7g112400	1e-42	Fairly specific	HRB1	similar to hypersensitive to red and blue	GO18	ABA, drought	TAIR
At3g07350		Mt8g012240	9e-62	Specific	N/A	Unknown protein	GO18	ABA, salt stress, cold, water deprivation	14
At3g07370		Mt8g011720	5e-119	Very specific	CHIP	Carboxyl terminus of HSC70-interacting protein	GO4	Drought, heat	TAIR
At3g07770		Mt5g097320	0	Very specific	HSP	Heat shock protein	GO6	ABS	10
At3g08710.1		Mt4g111950	2e-63	Specific	TRX	Thioredoxins (Trx)	GO1	cold, salinity	13
At3g08720		Mt5g069000	2e-67	Very specific	PK2	Serine / threonine protein kinase 2	GO6	cold, salinity	TAIR
At3g08730		Mt5g069000	4e-68	Very specific	ATPK1	Ribosomal S6 kinase	GO4	abiotic stresses	TAIR
At3g08860		Mt7g072420	0	Very specific	AGT	Beta-Ala-pyruvate aminotransferase	GO8	Drought, heat	10
At3g09440		Mt7g099680, Mt7g024390, Mt7g024580, Mt4g130540	0	Multiple	HSP70-3	Heat shock cognate 70 kDa protein 3	GO6	Salinity	7
At3g09600		Mt7g038290	6e-64	Specific but multiple	MYB	Myb family transcription factor	GO3	salt stress, abscisic acid stimulus	TAIR
At3g09640		Mt5g022510	4e-101	Specific	APX1b	L-ascorbate peroxidase 1b	GO1	Drought, heat	10
At3g09940.1		Mt5g084890	0.41	Low E, Uncertain	MDAR2	Monodehydroascorbate Reductase	GO6	ABS	13
At3g10410		Mt2g095750	0	Specific	SCPL49	Ser carboxypeptidase	GO8	Drought, heat	10
At3g10500		Mt3g096140	6e-73	Multiple	ANAC053	Arabidopsis NAC domain containing protein 53	GO3	ROS	3
At3g10520		Mt5g081030	1e-45	Multiple	NSHB2	Non-symbiotic haemoglobin 2	GO5	cold, mannitol, NaCl	1
At3g10860		Mt5g075690	1e-32	Unique	UCR	Ubiquinol-cytochrome C reductase	GO18	Drought/dehydration	4
At3g10920		Mt4g119930	0.075	Low E, Uncertain	MSD1	Superoxide dismutase [Mn]	GO1	stresses	AtGI
At3g11020		Mt5g083340	3e-26	Multiple	DREB2B	Dehydration-responsive element-binding protein 2B	GO3	Drought, heat	10
At3g11170		Mt4g015630	0	Specific but multiple	FAD7	Fatty acid desaturase 7	GO9	cold	TAIR
At3g11210		Mt3g070460	1e-131	Specific	CPRD49	GDSL-motif lipase/hydrolase family protein	GO9	Drought	AtGI
At3g11270		Mt5g081980, Mt3g070180	1e-176	Specific	MEE34	26S proteasome regulatory subunit S12	GO8	Drought, heat	10
At3g11340		Mt3g069690	5e-149	Specific	UGT	UDP-galactose transporter	GO15	ABA, drought	14
At3g11410		Mt2g066110	0	Unique	PP2CA	Protein phosphatase 2C	GO4	ABA, drought	14
At3g11480		Mt8g076900	7e-88	Specific	SAMT	S-adenosyl-L-methionine:salicylic acid carboxyl methyltransferase	GO5	Drought	18
At3g11630.1		AC146630_2.1, Mt1g105090	9e-126	Specific	2-cys PrxR A	2-cys peroxiredoxin	GO1	ABS	13
At3g12120		Mt7g093200	0	Specific	FAD2	Omega-6 fatty acid desaturase	GO9	Cold	AtGI
At3g12143		N/A			PGI	Similar to polygalacturonase-inhibitor protein	GO18	Salinity	6
At3g12580		Mt7g024390, Mt7g024580, Mt7g099680	0	Multiple	HST70	Heat shock protein 70	GO6	Salinity	7
At3g12620		Mt1g116260	0	Specific	PP2C	Protein phosphatase 2C	GO4	Drought	18
At3g12780		Mt2g066110	0	Specific	PGK1	Phosphoglycerate kinase 1	GO15	cold	TAIR
At3g12850		Mt7g076160	3e-12	Low E, Uncertain	COP9	Signalosome complex-related	GO17	Salinity	6
At3g12860		Mt4g103790	0	Unique	NOP56	Nucleolar protein NOP 56	GO17	Drought, heat	10
At3g13470		Mt1g090140	3e-146	Specific	CPN-60	Chaperonin 60 beta	GO8	Drought, heat	10
At3g13672		Mt3g017590	1e-69	Multiple	SINA	Seven in absentia-like protein	GO8	Drought, heat	10
At3g13690		AC225507_52.1, Mt2g100290, Mt8g101670	0	Specific but multiple	PK	Protein kinase family	GO4	Drought	18
At3g13784		Mt2g099950	0	Specific	CWINV5	Beta-fructofuranosidase	GO11	Drought, heat	10
At3g14210		Mt8g022790	3e-29	Less specific and multiple	ESM1	Epithiospecifier modifier 1	GO17	cold	TAIR
At3g14225		Mt8g022790, Mt6g031210, Mt8g022810	1e-88	Multiple	GLIP4	GDSL-motif lipase/hydrolase family protein	GO9	Salinity	6
At3g14440		Mt5g025250, Mt5g025270	1e-96	Specific	NCED3	9-cis-epoxycarotenoid dioxygenase	GO6	Salinity, ABA, drought, osmotic stress	7
At3g14660		Mt5g095230, Mt4g031820	2e-171	Specific but multiple	CYP72A13	Cytochrome P450-like protein family 72 subfamily A	GO6	ABA, drought	14
At3g14980		Mt1g072130	6e-94	Specific	NCED	9-cis-epoxycarotenoid dioxygenase	GO6	Drought	18
At3g14990		Mt4g085900	2e-79	Unique	MTMS	4-methyl-5(b-hydroxyethyl)-thiazole monophosphate biosynthesis protein, putative	GO6	Salinity	7
At3g15170		Mt6g032770, Mt3g109340	1e-76	Specific but two homologs	NAC1	Cup-shaped cotyledon 1	GO3	salt stress	TAIR
At3g15500		Mt3g088110	6e-71	Specific	AtNAC3	NAC transcription factor	GO3	ABA, drought	14
At3g15670		Mt1g045980	8e-12	Low E, Uncertain	LEA3	LEA group 3	GO16	ABS, ROS	3
At3g16170		Mt1g104810	4e-25	Less specific	AAE13	Long-chain-fatty-acid-CoA ligase-like protein, acyl-activation enzyme 13	GO9	Drought	18
At3g16350		Mt2g100930	4e-64	Specific	MYB	Myb family transcription factor	GO3	salt stress	TAIR
At3g16360		Mt2g100900	9e-54	Less specific	AHP4	Histidine-containing phosphotransfer protein	GO4	Drought, heat	10
At3g16370		Mt2g100620	4e-179	Specific but multiple	COR47	GDSL-motif lipase/hydrolase family protein	GO9	Salinity	7
At3g16450		Mt5g071200	1e-21	Specific but low E	JLN	Jacalin lectin family protein	GO18	Cold	TAIR
At3g16460		Mt5g071200	4e-25	Specific but low E	JLN	Jacalin lectin family protein	GO18	Cold	TAIR
At3g16470		Mt2g100590	1e-12	Specific but low E	JR1	Jacalin lectin family protein	GO18	cold	TAIR
At3g16520		Mt8g009050	2e-74	Multiple	FGT	Flavonol 3-O-glucosyltransferase-like protein	GO7	Drought	18
At3g17020		Mt2g034200	2e-44	Specific	USP	Universal stress protein (USP) family protein	GO6	cold	TAIR
At3g17390		Mt7g110310, Mt4g123810, Mt7g102120	0	Specific but three genes	SAMS3	S-adenosylmethionine synthase 3	GO15	cold	TAIR
At3g17510		Mt2g045470	2e-159	Specific	CIPK1, SOS2	CBL-interacting protein kinase 1	GO4	Drought	18
At3g17520		Mt4g123950	0.007	Low E, Uncertain	LEA	Late embryogenesis abundant domain-containing protein	GO18	Drought, heat	10
At3g17650		Mt6g077870, Mt5g091600	0	Specific	YSL5	Yellow stripe like 5	GO18	Salinity	7
At3g18080		Mt4g083000	7e-169	Specific	GH1	Glycosyl hydrolase family 1	GO11	Drought/dehydration	4
At3g18290		Mt8g104410, Mt6g083900	0	Specific	EMB2454	Zinc finger protein-related embryo defective 2425	GO3	abiotic stress, ABA	12
At3g18490		Mt1g039270	4e-91	Specific	ASPG1	Aspartyl protease family protein	GO8	Salinity	7
At3g19100		Mt4g086660, Mt5g017830	0	Specific	CaMK3	CDPK-related kinase	GO4	Drought, heat	10
At3g19170		AC151525_26.1, AC151525_26.2	0	Unique	ZNMP	Metalloprotease 1	GO6	Drought, heat	10
At3g19290		Mt3g101780	1e-67	Multiple	AREB2, ABF4	ABA-responsive element-binding protein 2	GO3	ABA	AtGI
At3g19580		Mt1g018420	3e-33	Less specific	AZF2	Zinc finger protein	GO3	water deprivation, abscisic acid stimulus	TAIR
At3g19590		Mt5g005120	0	Unique	WD-40	Mitotic checkpoint protein, WD-40 repeat family protein	GO17	abiotic stress, ABA	12
At3g19770		Mt3g073360	1e-145	Unique	VPS9	Vacuolar sorting protein 9 domain-containing protein	GO16	Drought/dehydration	4
At3g19990		Mt1g039190, Mt1g039340	0	Unique	N/A	Unknown protein	GO18	Drought	18
At3g20310		Mt2g014340	6e-23	Fairly specific	ERF7	Ethylene response factor subfamily B-1 of ERF/AP2 transcription factor family	GO3	water deprivation, abscisic acid stimulus	TAIR
At3g20500		Mt3g051240, Mt5g092360	0	Specific	PAP18	Purple acid phosphatase	GO17	Drought, heat	10
At3g20560.1		Mt2g083260	0	Specific	PDIL5-3	Thioredoxins (Trx)	GO1	ABS	13
At3g20740		Mt3g116500	1e-06	Low E, Uncertain	FIE1	Fertilization-independent endosperm 1	GO3	cold	TAIR
At3g20810		Mt1g071300	2e-15	Less specific	JMJC	Transcription factor jumonji (jmjC) domain-containing protein	GO3	Drought/dehydration	4
At3g21670		Mt5g085850	0	Very specific	NTP3	Nitrate transporter	GO2	cold, mannitol, NaCl	1
At3g21780		Mt5g090670	2e-107	Specific	UGT71B6	UDP-glucosyl transferase 71B6	GO15	osmotic stress, salt stress, ABA	TAIR
At3g21890		Mt2g088920	1e-20	Multiple	COZF	CONSTANS B-box zinc finger family protein	GO3	Drought	18
At3g22240		Mt2g069430	7e-13	Low E, Uncertain	N/A	Unknown protein	GO18	Salinity	1
At3g22370		Mt5g026620	3e-169	Specific but multiple	AOX1A	Alternative oxidase 1A	GO6	ROS	3
At3g22830		Mt1g071360	7e-86	Less specific	HSFA6B	Heat shock transcription factor-like protein	GO3	Salinity	7
At3g22840		AC233674_5.1	2e-49	Multiple	ELIP1	Early light-induced protein	GO6	Drought, heat	10
At3g22960		Mt1g099360	8e-100	Very specific	PK	Pyruvate kinase	GO11	Drought	18
At3g23050		Mt1g093240	7e-78	Specific	AXR2	Auxin resistant protein 2	GO3	water deprivation	TAIR
At3g23250		Mt1g043080	2e-71	Specific but multiple	MYB15	Myb domain protein 15	GO3	salt stress	TAIR
At3g23830		Mt3g084040	2e-37	Multiple	GRP4	Glycine-rich RNA-binding protein 4	GO6	osmotic stress, salt stress	TAIR
At3g23920		Mt5g013620, Mt5g013640	0	Unique	BMY7	Beta-amylase	GO11	Drought, heat	10
At3g23990		Mt1g090140, Mt1g090130	0	Specific	HSP60	Mitochondrial chaperonin	GO6	Drought, heat	10
At3g24170		Mt4g121880	5e-19	Unique	GR1	Glutathione reductase	GO1	Salinity	1
At3g24190		Mt4g026450	2e-119	specific but multiple	ABC1	ABC1 family protein	GO18	DRE, ABRE promoter analysis	2
At3g24310		Mt1g045610	3e-76	specific but multiple	MYB305	DNA-binding myb-like protein	GO3	cold, mannitol, NaCl	1
At3g24500		Mt6g086280	8e-60	Specific	MBF1C	Ethylene-responsive transcriptional coactivator, Multiprotein bridging factor 1C	GO3	Drought, heat	10
At3g24520		Mt5g029680	1e-45	Multiple	HSFC1	Heat shock transcription factor HSF1	GO3	Drought, heat	10
At3g24650		Mt7g083700	3e-36	Unique	ABI3	Abscisic acid-insensitive protein 3	GO3	ABA	AtGI
At3g24800		Mt7g058430	6e-100	Specific	PRT1	E3 ubiquitin ligase, Proteolysis 1	GO8	Salinity	7
At3g25230		Mt8g012340	0	Specific	ROF1	Rotamase FKBP	GO6	Drought, heat	10
At3g25760		Mt5g053950	3e-76	Specific	ERD12, AOC1	Allene oxide cyclase 1, chloroplast precursor	GO5	Drought	AtGI
At3g25770		Mt5g053950	4e-77	Specific	AOC2	Allene oxide cyclase 2	GO5	cold	TAIR
At3g26060.1		Mt4g124790	3e-91	Unique	PrxR Q	Peroxiredoxin Q	GO1	ABS	13
At3g26090		Mt3g086170	0	Unique	RGS1	G-protein signaling regulator	GO4	Drought	18
At3g26220		Mt3g076560	5e-98	Multiple	CYP71B3	Cytochrome P450-like protein family 71 subfamily B	GO6	Salinity	1
At3g26420		Mt2g008150	2e-54	Specific	ATRZ-1A	Zinc finger-containing glycine-rich RNA-binding protein	GO15	cold acclimation	TAIR
At3g26520		Mt4g063090	1e-120	Multiple	TIP2	Salt-stress induced tonoplast intrinsic protein	GO2	Salt	AtGI
At3g26690		Mt8g039690	8e-44	Specific	NUDT13	AP2/EREBP-like transcription factor	GO18	Drought	18
At3g26740		Mt7g084000	4e-26	Very specific	CCL	CCR protein, CCR-LIKE	GO5	Drought	18
At3g26744		Mt7g083900	2e-90	Multiple	ICE1	Basic helix-loop-helix (bHLH) family protein	GO3	Cold	AtGI
At3g27200.1		Mt6g023760	1e-48	Specific	BCP	Blue copper protein, plastocyanin-like domain-containing protein	GO18	ABS	13
At3g27690		Mt5g097280	3e-142	Multiple	LHCB2:4	Chlorophyll a/b-binding protein	GO6	Salinity	7
At3g27820.1		Mt3g087440	0.33	Low E, Uncertain	MDAR4	Monodehydroascorbate Reductase	GO15	ABS	13
At3g28007		Mt3g080990	4e-76	Multiple	MtN3	Nodulin MtN3 family protein	GO18	ABA, drought	14
At3g28210		Mt6g074660	0.03	Low E, Uncertain	PMZ	Zinc-finger protein, putative	GO3	ABA, drought	14
At3g28910		Mt6g012180	6e-100	Specific but multiple	MYB30	Myb domain protein 30	GO3	abscisic acid stimulus	TAIR
At3g29320		Mt6g014480	0	Specific	MUO	Plastidic alpha-glucan phosphorylase	GO11	water deprivation	TAIR
At3g29575		Mt3g025970	8e-26	Multiple	N/A	Unknown protein	GO18	ABA, drought	14
At3g29646		NA			N/A	Unknown protein	GO18	Drought/dehydration	4
At3g29780		Mt8g069370	0.17	Low E, Uncertain	RALFL27	Similar to tobacco rapid alkalinization factor	GO4	Salinity	6
At3g30775		Mt7g020820	2e-151	Specific but multiple	POX	Proline oxidase	GO8	Osmotic stress	AtGI
At3g43160		N/A	0.26	Low E, Uncertain	MEE38	Similar to merozoite surface protein	GO16	Cold	1
At3g43270		Mt2g044880, Mt4g124490, Mt4g087980	0	Multiple	PME	Pectin methylesterase	GO13	Drought	18
At3g44300		Mt1g116080	1e-06	Low E, Uncertain	NIT2	Nitrilase 2	GO6	Drought/dehydration	4
At3g44310		Mt1g116080	3e-06	Low E, Uncertain	NIT1	Nitrilase 1	GO5	Drought/dehydration	4
At3g44880		Mt4g057200	0	Unique	LLS1	Lethal leaf spot 1-like protein, Accelerated cell death 1	GO14	Drought, heat	10
At3g45140		Mt3g079420	0	Specific	LOX 2	Lipoxygenase 2	GO9	Drought	18
At3g45410		Mt5g035910	3e-125	Specific	SRRK	Salt-responsive receptor protein kinase	GO4	Salt	AtGI
At3g45640		Mt4g061130, Mt4g087620	0	Very specific	MPK3	Mitogen-activated protein kinase	GO4	ROS	3
At3g46130		Mt2g096380	3e-71	Specific	MYB111	Myb domain protein 111	GO3	salt stress, abscisic acid stimulus	TAIR
At3g46230		Mt5g081530, Mt4g091590	2e-63	Multiple	HSP17.4	Heat shock protein 17.4	GO6	Drought, heat	10
At3g46620		Mt2g097620	3e-77	Multiple	ZF	Zinc-finger protein	GO3	ROS	3
At3g46640		Mt4g064890, Mt4g064730	1e-62	Multiple	PCL1	Phytoclock 1	GO3	DRE, ABRE promoter analysis	2
At3g46660		Mt3g069710	2e-106	Multiple	UGT	UDP-galactose transporter	GO15	ABA, drought	14
At3g46970		Mt6g014480	0	Very specific	PHS2	Cytosolic alpha-glucan phosphorylase	GO11	water deprivation	TAIR
At3g47340		Mt5g071360, Mt3g087220	0	Unique	ASN1	Gln-dependent Asn synthetase	GO8	cold, mannitol, NaCl	1
At3g47420		Mt4g071370	0.26	Low E, Uncertain	G3PP	Glycerol-3-phosphate permease	GO2	Drought	18
At3g47430		Mt1g075490	0.43	Low E, Uncertain	PEX11	PMP31 protein	GO6	cold, mannitol, NaCl	1
At3g47500		Mt7g010950	1e-66	Specific but multiple	CDF3	Cycling DOF factor 3	GO3	Cold	1
At3g47520		Mt5g014710	8e-128	Specific but multiple	MDH	Malate dehydrogenase	GO15	Cold	TAIR
At3g47600		Mt3g039990	3e-96	Specific but multiple	MYB94	Myb domain protein 94	GO3	salt stress, abscisic acid stimulus	TAIR
At3g47950		Mt4g127710, Mt3g108800	0	Specific	AHA4	H(+)-ATPase 4	GO18	salt stress	TAIR
At3g48350		AC235753_1.1	6e-117	specific	CysP	Cysteine proteinase like	GO8	ABA, drought	14
At3g48520		Mt3g080580	0	specific	CYP94B3	Cytochrome P450-like protein family 94 subfamily B	GO6	Drought, heat	10
At3g48750		AC235662_25.1	5e-173	Specific	CDC2	Cell division control 2	GO15	cold	TAIR
At3g49110		Mt2g029850	3e-113	Specific	PRX33	Peroxidase	GO6	Salinity	7
At3g49260		Mt1g007920	3e-50	specific	IQD21	Guard cell associated protein	GO15	Drought	AtGI
At3g49290		Mt3g091760	3e-114	specific	ABIL2	ABL interactor-like protein 2	GO18	Drought	18
At3g49780		Mt5g015140	0.0002	Low E, Uncertain	PSK4	Phytosulfokine peptide precursor	GO16	Drought	18
At3g49850		Mt5g015340	3e-56	Fairly specific	TRB3	Telomere repeat binding factor 3	GO3	salt stress	TAIR
At3g50060		Mt5g016510	1e-65	Specific	MYB77	A member of the R2R3 MYB transcription factor gene family	GO3	salt stress, abscisic acid stimulus	TAIR
At3g50500		Mt8g079560, Mt5g018050	0	Specific	SRK2D	SNF1-related protein kinase 2.2	GO4	osmotic stress, salt stress, ABA	TAIR
At3g50830		AC233653_1009.1, AC157372_5.1	6e-90	Specific but multiple	COR413-PM2	Stress-responsive protein	GO6	Cold	AtGI
At3g50960		Mt8g076890	7e-92	Unique	PLP3A	Phosdicin-like protein 3 homolog	GO18	DRE, ABRE promoter analysis	2
At3g50970		Mt3g118530, Mt3g116060	0	Multiple	Xero2,LTI30	Dehydrin Xero2, Low temperature-induced 30	GO6	Drought, heat	10
At3g50980		Mt8g106140	0.16	Low E, Uncertain	XERO1	Dehydrin-like protein dehydrin Xero2	GO6	Drought, heat	10
At3g51030	5	Mt1g023140	5e-54	Multiple	TRXH	Thioredoxin h	GO1	Drought	18
At3g51240		Mt8g075890, Mt8g075830	0	Specific	F3H	Flavanone 3-hydroxylase	GO7	Cold	1
At3g51490		Mt3g118530	0	Specific	TMT3	Tonoplast monosaccharide transporter 3	GO2	cold, water deprivation, salt stress	TAIR
At3g51780		Mt7g069610	7e-54	Specific	BAG4	BCL-2-associated athanogene 4	GO14	cold, salt stress	TAIR
At3g51895		Mt1g071530	0	Unique	ATST1	Sulphate transporter	GO2	Drought	18
At3g51900		NA			ST1	Sulfate transporter	GO2	cold, mannitol, NaCl	1
At3g52260		Mt1g095580	1e-115	Unique	PUS	Pseudouridine synthase family protein	GO10	Drought/dehydration	4
At3g52490		Mt1g090640	3e-155	Specific	HSP	Heat shock protein-related	GO6	Drought	18
At3g52500		Mt4g100990	3e-38	Multiple	AspP	Aspartyl protease family protein	GO8	Drought	18
At3g52640		Mt3g065110	0	Unique	NICL	Nicastrin-related	GO18	Salinity	7
At3g52850		Mt8g005800, Mt1g106940	0	Specific	VSR1	Vacuolar sorting receptor homolog	GO15	Drought, heat	10
At3g52880.1		Mt2g086970	0.054	Low E, Uncertain	MDAR1	Monodehydroascorbate Reductase	GO6	ABS	13
At3g52960.1		Mt6g087990	9e-39	Specific	PrxR	Peroxiredoxin	GO1	ABS	13
At3g53110		Mt1g062240, Mt1g061970	5e-178	Specific	LOS4	Low expression of osmotically reponsive genes 4	GO6	cold	TAIR
At3g53130		Mt1g062190	0	Unique	CYP97C1	Cytochrome P450-like protein family 97 subfamily C	GO6	Salinity	7
At3g53230		AC235487_5.1	0	Specific	CDC48	CDC48-like endoplasmic reticulum ATPase, Cell divisiob cycle protein 48	GO6	Drought, heat	10
At3g53400		Mt7g101130	1e-96	Specific	N/A	Unknown protein	GO18	Drought	18
At3g53420		Mt7g101190	3e-150	Specific but multiple	PIP2A	plasma membrane intrinsic protein subfamily PIP2	GO2	water deprivation, salt stress	TAIR
At3g53990		Mt7g065770	2e-35	Specific	USP	Universal stress protein (USP) family protein	GO6	cold	TAIR
At3g54050		Mt2g008030	3e-101	Specific	FBPASE	Fructose-bisphosphatase precursor	GO11	Drought	18
At3g54400		Mt8g039540, Mt3g014290	2e-167	Specific	NDBP	Nucleoid DNA-binding-like protein	GO8	Salinity	7
At3g54660.1		Mt2g034580	4e-27	Less specific	GR2	Glutathione Reductase	GO1	ABS	13
At3g54820		Mt7g101190	3e-157	Multiple	PIP2D	Aquaporin MIP-like protein	GO2	Drought, heat	10
At3g54940		Mt1g023210	6e-136	Specific	CysP	Cys proteinase	GO8	ABS, ROS	3
At3g55120		Mt1g115870, Mt1g115890	4e-87	Specific	CFI	Chalcone-flavonone isomerase	GO7	Drought	18
At3g55270		Mt3g086540	2e-169	Very specific	MKP1	MAP kinase phosphatase	GO4	salt stress	TAIR
At3g55330		Mt7g088880	5e-08	Low E, Uncertain	PSOE	Photosystem II oxygen evolving complex protein	GO12	Drought	18
At3g55530		Mt4g064560	4e-69	Very specific	SDIR1	Salt-and drought-induced ring finger 1	GO4	water deprivation, salt stress, ABA	TAIR
At3g55570		Mt5g080750	8e-19	Low E, Uncertain	N/A	Unknown protein	GO18	Drought	18
At3g55610		Mt4g020450, Mt3g069080	0	Specific	P5CS 2	Delta 1-pyrroline-5-carboxylate synthetase B	GO8	Drought, heat	10
At3g55730		Mt5g016510	5e-48	Specific	MYB109	Myb domain protein 109	GO3	salt stress, abscisic acid stimulus	TAIR
At3g55740		Mt5g081630	0	Unique	ProT2	proline transporter 2	GO2	water deprivation, salt stress	AtGI
At3g55980		Mt5g082830	5e-166	Specific	ZFAR	Zinc finger ankyrin repeat	GO3	ROS	3
At3g55990		Mt3g070900	0	Very specific	ESK1	Eskimo1	GO18	freezing, salt stress	TAIR
At3g56090.1		Mt5g083170	1e-83	Multiple	FER3	Ferritin 3	GO1	ABS	13
At3g56200		Mt5g083770, Mt3g072110	4e-146	Specific	AAP	Amino acid transporter family	GO2	Salinity	7
At3g56350	8	Mt1g068780	1.3	Low E, Uncertain	MnSOD	Superoxide dismutase [Mn]	GO1	stresses	AtGI
At3g56400		Mt5g067700	3e-24	Multiple	WRKY70	WRKY70 transcription factor	GO3	ROS	3
At3g56850		Mt6g026800	3e-84	Specific	AREB3	ABA-responsive element-binding protein 3	GO3	ABA	AtGI
At3g57040		Mt8g038620	3e-64	Specific	RR4	Response reactor 4	GO4	Drought	18
At3g57260		Mt5g089320	2e-177	Multiple	BG2	β-glucanase 2	GO6	Salinity	7
At3g57520		Mt5g096820	0	Specific but multiple	SIP2	Probable imbibition protein	GO18	Drought, heat	10
At3g57530		Mt5g089320	2e-177	Specific but multiple	CPK32	Calcium-dependent protien kinase 32	GO4	salt stress	TAIR
At3g57540		Mt7g091990	2e-55	Unique	REM	DNA binding protein, Remorin family protein	GO17	Drought, heat	10
At3g57600		Mt7g092190	4e-60	Specific	DREB2F	Dehydration-responsive element-binding protein 2F	GO3	Drought	AtGI
At3g58100		Mt4g079530	2e-42	Multiple	GH17	Glycosyl hydrolase family 17 protein	GO11	Salinity	6
At3g59030		Mt5g090290	0	Specific	TT12	Transparent testa 12 protein	GO2	Drought	18
At3g59290		Mt7g006280	2e-142	Specific	EPSIN3	Epsin-like protein	GO18	Salinity	7
At3g59350		Mt1g116520	0	Specific	Pti1	Pto kinase interactor 1	GO4	Drought, heat	10
At3g59380		Mt2g098650	5e-129	Very specific	FTA	Farnesyltransferase A	GO8	water deprivation	TAIR
At3g59400		Mt7g091350	1.1	Low E, Uncertain	GUN4	Genomes uncoupled 4	GO12	Drought	18
At3g59770		Mt4g087530	0	Unique	SAC9	Suppressor of actin 9	GO18	cold, osmotic stress	TAIR
At3g59820		Mt7g080610, Mt8g088580	0	Specific	LZEFP	Leu zipper-EF-hand protein, calcium-binding mitochondrial protein-related	GO4	Drought, heat	10
At3g59930		Mt5g027460	0.11	Low E, Uncertain	DEFL	Encodes A defensin-like family protein	GO18	Drought/dehydration	4
At3g60140		Mt6g078450	4e-171	Multiple	DIN2	β-glucosidase-like protein	GO14	Drought/dehydration	4
At3g60350		Mt1g104870	4e-08	Low E, Uncertain	ArmP	Arm repeat containing protein	GO8	Drought, heat	10
At3g60900		Mt7g075270	2e-141	Specific	FLA10	GPI-anchored protein, Fasciclin-like arabinogalactan-protein 10	GO18	Salinity	7
At3g61190		Mt8g032320	2e-05	Low E, Uncertain	BAP1	Bon association protein 1	GO1	cold, heat	TAIR
At3g61350		Mt8g085600	1e-20	Low E, Uncertain	SKIP4	SKP1 interacting partner 4	GO18	Cold	TAIR
At3g61430		Mt3g070210	1e-144	Specific	PIP1A	Plasma membrane intrinsic protein 1;1	GO2	water deprivation, salt stress	TAIR
At3g61460		Mt7g038550	1e-57	Specific	BRH1	RING zinc finger protein	GO3	Drought	18
At3g61820		Mt1g039270	2e-96	Specific	AspP	Aspartyl protease family protein	GO18	Salinity	7
At3g61890		Mt8g026960	1e-47	Multiple	HB-12	Homeobox-leucine zipper protein	GO3	Drought, heat	10
At3g62090		Mt1g084980	6e-22	Multiple	PIL2	phytochrome-associated protein 3	GO4	Drought, heat	10
At3g62560		Mt2g034640	6e-106	Specific	GBP	Small GTP-binding protein	GO2	Drought, heat	10
At3g62650		Mt7g109220, Mt7g109100	6e-17	Low E, Uncertain	MCP	Mitochondrial carrier protein	GO18	Drought/dehydration	4
At3g62950.1		Mt7g108220	3e-48	Specific	GLR	Glutaredoxin	GO1	ABS	13
At3g63010		Mt1g089310	0	Specific	GID1B	Gibberellin insensitive dwarf1B	GO5	Drought	18
At3g63080.1		Mt8g105630	5e-69	Multiple	GPX5	Glutathione Peroxidase 5	GO1	ABS	13
At3g63520		Mt5g025270	2e-109	Specific	NCED1	Caraotenoid cleavage dioxygenase 1	GO5	water deprivation	TAIR
At4g00430		Mt3g070210	4e-107	Specific	PIP1E	Plasma membrane intrinsic protein 1;4	GO2		TAIR
At4g01020		Mt3g014030	0	Unique	HDCP	Helicase domain-containing protein	GO18	DRE, ABRE promoter analysis	2
At4g01060		Mt5g009460	6e-20	Specific	CPL3	Caprice-like MYB3	GO3	salt stress, abscisic acid stimulus	TAIR
At4g01120		Mt7g116890	1e-55	Specific	GBF2	G-box binding factor	GO3	Drought, heat	10
At4g01280		Mt7g038290	2e-86	Specific	LCL4	Myb family transcription factor	GO3	salt stress, abscisic acid stimulus	TAIR
At4g01370		Mt7g038040	0	Specific but multiple	MPK4	Mitogen-activated protein kinase	GO4	stress	AtGI
At4g01950		Mt1g086650	1e-150	Specific	GPAT3	Glycerol-3-phosphate acyltransferase 3	GO17	Salinity	7
At4g02050		Mt5g094760, Mt4g116770	0	Specific but multiple	HT	Hexose transporter, sugar transporter	GO2	Drought	18
At4g02200		Mt2g035070	8e-26	Multiple	DI19L	Drought-induced-19-like 1	GO6	Drought	AtGI
At4g02280		Mt1g088170	0	Specific	SUS3	Sucrose synthetase, putative	GO11	Salinity	7
At4g02330		Mt1g088330	0	Multiple	PE	Pectinesterase family	GO13	cold, mannitol, NaCl	1
At4g02380		Mt1g088230	4e-08	Low E	SAG21	Late embryogenesis abundant like 5	GO14	cold, oxidative stress, ROS, water deprivation	TAIR
At4g02430		Mt1g083400	4e-79	Multiple	ASF	Similar to alternative splicing factor ASF	GO17	Drought, heat	10
At4g02520		Mt7g089760	9e-60	Multiple	GSTF2	Glutathione S-transferase	GO1	ROS	3
At4g02530		Mt4g114790	1e-56	Specific	TLP	Thylakoid lumenal 16.5 kDa protein, chloroplast precursor	GO12	Drought	18
At4g02630		Mt5g017080	8e-178	Specific	RPK	Receptor protein kinase	GO4	Drought	18
At4g03290		Mt7g089760	9e-60	Specific	CaEF	Calcium-binding protein, EF hand calcium-binding protein	GO18	Cold	TAIR
At4g03320		Mt5g024800	2e-68	Specific	TIC20-IV	Translocon at the inner encelope membrane of chloroplasts 20-IV	GO18	Drought, heat	10
At4g03560		Mt4g086260	0.076	Low E, Uncertain	TPC1	Calcium channel, Two-pore channel 1	GO2	Drought	18
At4g04020		Mt2g025050	5e-115	Specific	FIB	Fibrillin, putative	GO6	Drought, heat	10
At4g04650		Mt1g071490	1e-18	Fairly specific	N/A	unknown protein	GO18	Cold	TAIR
At4g04950.1		AC233659_13.1	0	Unique	Trx	Thioredoxins (Trx)	GO1	ABS	13
At4g05100		Mt4g091490	2e-91	Specific	MYB74	Myb domain protein 74	GO3	salt stress, abscisic acid stimulus	TAIR
At4g05180		Mt2g082580	5e-14	Low E, Uncertain	PSBQ-2	Chloroplast oxygen-evolving protein 16 kDa subunit, Photosystem II subunit Q-2	GO12	Drought	18
At4g05190		Mt2g082570, Mt2g010760	0	Specific	ATK5	Kinesin protein involved in microtubule spindle morphogenesis	GO16	Salinity	6
At4g08390		Mt3g088160	3e-161	Specific	sAPX	L-ascorbate peroxidase, stromal	GO1	stresses	AtGI
At4g08500		Mt5g060350	4e-149	Specific	MEKK1	Mytogen activated protein kinase kinase	GO4	cold, osmotic stress, salt stress	TAIR
At4g08920		Mt5g063920	0	Very specific	CRY1	Cryptochrome 1	GO15	water deprivation	TAIR
At4g08950		Mt8g095910	5e-131	Multiple	Phi1	phi-1-like phosphate-induced	GO5	cold, mannitol, NaCl	1
At4g09010		Mt5g064610	4e-142	Specific	APX4	Ascorbate peroxidase, chloroplast precursor	GO1	Salinity	7
At4g09150		Mt2g006450	0	Unique	TCP	T-complex protein 11	GO18	Drought	18
At4g09460		Mt4g073420	2e-84	Specific but multiple	MYB6	Myb domain protein 6	GO3	salt stress, abscisic acid stimulus	TAIR
At4g09650		Mt4g103330	4e-70	Specific	ATPS	ATP synthase delta chain, chloroplast precursor	GO2	Drought	18
At4g10250		Mt7g034910	5e-67	Specific	HSP22	Heat shock protein 22	GO6	Drought, heat	10
At4g10310		Mt6g092820	1e-110	Unique	HKT1	Sodium transporter	GO2	salt stress	TAIR
At4g10380		Mt1g098080, Mt1g097840	2e-122	Specific	NIP5;1	Aquaporin, Nodulin-like intrinsic protein NIP1-2	GO2	Drought	18
At4g11150		Mt5g009720	4e-119	Unique	EMB2448	Embryo defective 2448	GO2	Cold	TAIR
AT4G11280		Mt7g079080	0	Specific	ACCS6	Aminocyclopropane carboxylic acid synthase 6	GO5	ROS	3
At4g11290		Mt2g088770	2e-144	Specific	PER19a	Peroxidase ATP19a	GO6	cold, mannitol, NaCl	1
At4g11420		Mt7g099920	0	Unique	EIF3A	Initiation factor 3a-like	GO15	Salinity	7
At4g11600.1		Mt8g098410	1e-93	Multiple	GPX6	Glutathione Peroxidase 6	GO1	ABS	13
At4g12280		Mt3g080500	1e-161	Specific	CAO	Copper amine oxidase	GO15	Drought, heat	10
At4g12420		Mt4g101650	0	Very specific	SKU5	pollen-specific protein, putative	GO16	cold, mannitol, NaCl	1
At4g12470		Mt4g101280	3e-40	Multiple	PILTP	Protease inhibitor / seed storage / lipid transfer protein	GO2	ABS, ROS	3
At4g12480		N/A	N/A	N/A	PILTP	Protease inhibitor / seed storage / lipid transfer protein	GO2	ABS, ROS	3
At4g12510		Mt4g101280	4e-23	Multiple	PILTP	Protease inhibitor / seed storage / lipid transfer protein	GO2	Salinity	1
At4g12680		Mt3g082330	0	Unique	N/A	Unknown protein	GO18	abiotic stress, ABA	12
At4g12720		Mt3g082770	2e-82	Specific	NUDT7	Nudix hydrolase homolog 7	GO6	oxidative stress, salt stress	TAIR
At4g12730		Mt5g098420	3e-137	Specific	FLA2	Endosperm specific protein, putative	GO17	cold, mannitol, NaCl	1
At4g12880.1		Mt6g013420	6e-43	Less specific	ENODL19	Blue copper protein, plastocyanin-like domain-containing protein	GO18	ABS	13
At4g13430		Mt1g045750	0	Unique	IPMD	3-isopropylmalate dehydratase large subunit	GO8	Drought	18
At4g13500		Mt5g098530	2e-38	Specific	N/A	Unknown protein	GO18	Drought	18
At4g13620		CU651566_18.1	2e-35	Multiple	AP2TF	AP2 domain transcription factor	GO3	Drought	18
At4g13850		Mt3g084040	4e-38	Fairly specific and multiple	GRP2	Glycine-rich protien 2	GO6	cold, osmotic stress	TAIR
At4g14000		Mt2g098630	2e-42	Specific	N/A	Unknown protein	GO18	Cold	2
At4g14030		Mt3g084410	0	Unique	SBP	Selenium-binding protein-like	GO6	Salinity	7
At4g14090		Mt3g084520	6e-93	Multiple	GT2	Glucosyltransferase	GO11	Drought	18
At4g14130		Mt3g084630, Mt3g084620	9e-145	Multiple	XTH15	Xyloglucan endotransglycosylase	GO11	Drought/dehydration	4
At4g14190		Mt3g100600	4e-16	Multiple	PPRP	Pentatricopeptide (PPR) repeat-containing protein	GO18	Salt	AtGI
At4g14690		AC233674_5.1	8e-45	Unique	ELIP2	Early light-inducible protein 2	GO6	Cold	1
At4g15430		Mt5g086610	0	Very specific	ERD	Similar to early-responsive to dehydration protein-related	GO18	Cold	1
At4g15910		Mt4g120040	4e-11	Low E, Uncertain	DI21	Drought-induced protein-like	GO6	Drought, heat	10
At4g16160		Mt2g034550	2e-48	Specific	ATOEP16-S	Mitochondrial inner membrane translocase	GO2	ABS, ROS	3
At4g16350		AC233669_22.1	5e-91	Specific	CBL6, SOS3	Calcineurin B-like protein 6, SOS3-like calcium-binding protein 2	GO4	Drought	16
At4g16390		Mt4g133740	0	Specific	SIT	salt-inducible protein homolog	GO18	Salt	AtGI
At4g16420		Mt2g026310	3e-163	Specific	ADA2B	Transcriptional co-activator	GO3	cold acclimation	TAIR
At4g16563		Mt5g012490	3e-146	Specific	CNDP	Chloroplast nucleoid DNA-binding protein, Aspartyl protease family protein	GO8	Drought	18
At4g16845		Mt5g013150	5e-106	Unique	VRN2	Reduced vernalization response 2	GO3	cold	TAIR
At4g17030		Mt5g013440	2e-99	Specific	EXPR1	Allergen-like protein	GO16	Drought, heat	10
At4g17090		Mt5g013640	0	Very specific	BMY8	Beta-amylase	GO11	Cold	1
At4g17250		Mt4g101050	0	Specific but multiple	N/A	unknown protein	GO18	heat acclimation	TAIR
At4g17260		Mt5g012390, Mt4g101130	0	Unique	LDH1	Lactate dehydrogenase	GO6	Salinity	7
At4g17340		Mt8g013680	2e-98	Specific but multiple	DELTA-TIP2	Tonoplast intrinsic protein 2;2	GO2	salt stress	TAIR
At4g17350		Mt5g012870	5e-86	Unique	N/A	Unknown protein	GO18	Drought	18
At4g17490		Mt4g100450	4e-52	Specific but multiple	ERF6	Ethylene responsive element binding protein 6	GO3	Drought	18
At4g17500		Mt4g100380	6e-61	Specific	ERF1	Ethylene-responsive element-binding factor 1	GO3	Cold	1
At4g17615		Mt5g096420	1e-88	Specific	CBL1	Calcineurin B-like protein 1	GO4	cold, osmotic stress, salt stress	TAIR
At4g17770		Mt4g080160	0	Very specific	TPS5	Trehalose-6-phosphate synthase	GO11	trehalose biosynthetic process,metabolic process,trehalose biosynthetic process	AtGI
At4g17870		Mt5g030500	2e-78	Very specific	RCAR11	Regulatory component of ABA receptor 11	GO18	cold, mannitol, NaCl	1
At4g18280		Mt1g096090, Mt1g095950	6e-07	Uncertain	GCWP	Glycine-rich cell wall protein	GO13	Drought, heat	10
At4g18780		Mt8g086600, Mt3g030040	0	Specific but multiple homologs	CESA8	Cellulose synthase 8	GO13	water deprivation, osmotic stress	TAIR
AT4G18880		Mt8g087540	7e-75	Specific	HSFA4A	Arabidopsis thaliana heat shock transcription factor A4A	GO6	ROS	3
At4g19030		Mt8g087720	3e-120	Less specific	NLM1	Nodulin-26-like protein	GO2	Salinity	1
At4g19120		Mt5g026930	0	Specific	ERD3	Early-responsive to dehydration stress protein 3	GO6	Drought	AtGI
At4g19170		Mt5g025230, Mt5g025250, Mt5g025270	0	Specific but Three genes	NCED4	9-cis-epoxycarotenoid dioxygenase 4	GO6	Salinity	7
At4g19230		Mt8g072260	0	Specific	CYP707A1	Cytochrome P450-like protein family 707 subfamily A	GO6	Drought, heat	10
At4g19600		Mt2g068690	4e-158	Specific but multiple	CycC	Cyclin C, putative	GO6	Drought, heat	10
At4g19690		Mt4g083570	8e-55	Specific	IRT1	Iron-responsive transporter	GO2	ABS, ROS	3
At4g19880		Mt4g084040	0	Unique but multiple	GST	Glutathione S-transferase family protein	GO1	ROS	3
At4g20070		Mt2g035370	0	Unique	AAH	Hydantoin utilization protein-related	GO8	Drought	18
At4g20090		Mt2g035450	0	Multiple	EMB1025	Membrane-associated salt-inducible-like protein	GO18	Salt	AtGI
At4g20260		Mt7g005900	0.49	Low E, Uncertain	DREPP	DREPP plasma membrane polypeptide family protein	GO18	Cold	TAIR
At4g20320		Mt8g070540	0	Very specific	CTPS	CTP synthase	GO10	Drought, heat	10
At4g21150		AC235664_13.1	0.91	Low E, Uncertain	RPN2	Ribophorin II family protein	GO18	cold	TAIR
At4g21320		Mt5g012170	1.2	Low E, Uncertain	HSA32	Heat-stress-associated 32	GO6	heat acclimation	TAIR
At4g21410		AC235005_32.1	2e-170	Multiple	PK	Protein kinase	GO4	cold, mannitol, NaCl	1
At4g21440		Mt4g091490	3e-87	Specific but multiple	MYB102	Arabidopsis MYB-like 102	GO3	osmotic stress, salt stress, ABA	TAIR
At4g21650		Mt8g083220	0	Multiple	Sub	Subtilisin proteinase	GO8	Drought, heat	10
At4g21680		Mt5g014150, Mt4g098800	0	Specific but multiple	POT	Proton-dependent oligopeptide transport family protein	GO2	ABA, drought	14
At4g21990		Mt7g027550	3e-37	Specific	APR3	5′-adenylylsulfate reductase	GO15	Salinity	7
At4g22200		Mt2g006870	0	Specific	AKT3	Potassium channel protein	GO2	cold, mannitol, NaCl	1
At4g22240		Mt2g025050	1e-113	Specific	FIBL	Fibrillin precursor-like protein	GO17	Drought/dehydration	4
At4g22470		Mt4g108150	6e-07	Uncertain	Ext	Extensin-like Pro-rich protein	GO2	cold, mannitol, NaCl	1
At4g22590		Mt4g101600, Mt3g008500	1e-152	Specific	TPP	Trehalose-6-phosphate phosphatase	GO11	Drought, heat	10
At4g22920		Mt5g011120	4e-107	Very specific	NYE1	Similar to the tomato senescene-inducible chloroplast stay-green protein 1	GO15	Drought	18
At4g23050		Mt5g010730	0	Specific	MAP3K	Serine / threonine kinase	GO4	Drought, heat	10
At4g23190		AC235006_15.1	2e-162	Multiple	CRK11	Serine / threonine kinase-like protein	GO4	Salinity	7
At4g23400		Mt5g010150	2e-160	Specific	PIP1D	Plasma membrane intrinsic protein 1;5	GO2	salt stress	TAIR
At4g23450		Mt7g038450	9e-23	Multiple	ZF	Zinc finger protein, putative	GO3	cold, mannitol, NaCl	1
At4g23500		Mt7g038050	0	Specific but multiple	GH28	Glycoside hydrolase family 28 protein	GO11	Salinity	6
At4g23600		Mt8g061360	7e-86	Specific	JR2	Tyrosine transaminase	GO8	Cold	2
At4g23630		Mt1g099500	2e-89	Specific	BTI1	VIRB2-ineracting protein 1	GO18	cold, mannitol, NaCl	1
At4g23670		Mt1g031640	1e-16	Multiple	MLP1	Major latex protein 1	GO6	Drought, heat	10
At4g23680		Mt1g031640	2e-17	Multiple	MLP	Major latex protein	GO6	Drought/dehydration	4
At4g23700		Mt5g009780, Mt5g009770, Mt5g009800, Mt4g078020, Mt4g078120	0	Very specific	CHX17	Cation / H+ exchanger 17	GO2	cold, mannitol, NaCl	1
At4g24000		Mt3g060220	2e-147	Multiple	CSLG2	Cellulose synthase-like G2	GO11	Drought, heat	10
At4g24040		Mt4g086290	0.43	Low E, Uncertain	TRE1	Trehalase	GO11		AtGI
At4g24190		Mt1g025430	0	Specific	SHD	Shepherd protein / clavata formation protein, putative	GO6	Drought	AtGI
At4g24220		AC235748_1006.1	0	Specific but multiple	VEP1	Giberellin beta-hydroxylase	GO6	Drought	18
At4g24280		Mt2g005690	0	Specific	CPHSC70-1	Heat shock 70 protein	GO6	Drought, heat	10
At4g24360		NA			SP	Storage protein, putative	GO18	Cold	1
At4g24580		Mt3g100580	0	Unique	CyCBF	Cytochrome c biogenesis factor	GO8	Drought	18
At4g24730		N/A			NRT3.2	Nitrate transporter	GO2	Drought	18
At4g24960		Mt3g099010	6e-47	Specific	AtHVA22d	ABA-induced like protein	GO6	Salinity	7
At4g25000		Mt1g019440	1e-178	Specific	AMY1	Alpha-amylase	GO11	Drought, heat	10
At4g25100	12	Mt1g110130	0.33	Low E, Uncertain	FSD1	Superoxide dismutase [Fe]	GO1	Drought/dehydration	4
At4g25200		Mt7g102590	9e-35	Specific	HSP23.6-MITO	Mitochondrion-small heat shock protein	GO6	Drought, heat	10
At4g25310		AC235677_23.1	2e-104	Specific	FeAO	Fe(II)/ascorbate oxidase	GO1	cold, mannitol, NaCl	1
At4g25390		Mt8g035560	4e-109	Multiple	RLK	Receptor-like kinase	GO4	cold, mannitol, NaCl	1
At4g25470		Mt1g101600	2e-48	Multiple	DREB1C	Dehydration-responsive element-binding protein 1D	GO3	Drought	15
At4g25480		Mt1g101600	3e-44	Multiple	DREB1A	Dehydration response element B1A	GO3	cold, mannitol, NaCl	1
At4g25490		Mt1g101600	1e-41	Multiple	DREB1B	Dehydration-responsive element-binding protein 1D	GO3	cold, mannitol, NaCl	1
At4g25640		Mt1g100180	0	Specific	MATE	MATE efflux family protein	GO2	Cold	1
At4g25810		Mt7g093530	1e-145	Multiple	XTH25	Xyloglucan endotransglycosylase	GO11	cold, mannitol, NaCl	1
At4g26080		Mt3g104710	2e-112	Specific	ABI1	Calcium-modulated protein phosphatase 2C ABI1	GO4	ABA, drought	14
At4g26200		Mt6g091760	0	Specific	ACCS7	Aminocyclopropane carboxylic acid synthase 7	GO5	cold, mannitol, NaCl	1
At4g26560		Mt3g060730	8e-86	Multiple	CBL7, SOS3	Calcineurin B-like protein 7, SOS3-like calcium-binding protein 3	GO4	Drought	16
At4g26570		Mt5g096420	2e-136	Multiple	CBL3, SOS3	Calcineurin B-like protein 3, SOS3-like calcium-binding protein 6	GO4	Drought	16
At4g27030		Mt3g051220	8e-132	Unique	ISS	Similar to ubiquitin-conjucating enzyme	GO18	Cold	1
At4g27140		N/A	0.17	Low E, Uncertain	ALB1	2S albumin storage protein	GO2	Drought/dehydration	4
At4g27150		N/A	0.41	Low E, Uncertain	ALB2	2S albumin storage protein	GO2	Drought/dehydration	4
At4g27160		N/A	0.12	Low E, Uncertain	ALB3	2S albumin storage protein	GO2	Drought/dehydration	4
AT4G27280		Mt2g081580	6e-28	Less specific	CaEF	Calcium-binding EF-hand protein	GO4	ROS	3
At4g27310		Mt2g089310	5e-33	Specific	ZF	Zinc-finger protein	GO3	Cold	1
At4g27410		Mt3g088110	7e-05	Low E, Uncertain	ANAC072	NAC transcription factor and ATAF-like protein, responsive to desiccation	GO3	ABA, drought	14
At4g27470		Mt5g019300	6e-23	Less specific	RZF	RING zinc finger protein	GO3	Salinity	7
At4g27570		Mt2g014900	1e-136	Multiple	URT	UDP-rhamnosyltransferase	GO8	Cold	1
At4g27670		Mt3g092460	6e-46	Less specific	HSP21	Heat shock protein 21	GO6	Drought, heat	10
At4g27730		Mt3g080870	0	Specific but multiple	OPT6	Oligopeptide transporter 6	GO2	cold, mannitol, NaCl	1
At4g27740		Mt3g091840	1e-31	Less specific	N/A	Unknown protein	GO18	Drought	18
At4g27830		Mt4g016920	8e-172	Less specific	BG	β-glucosidase	GO11	cold, mannitol, NaCl	1
At4g28110		Mt4g091490	3e-79	Specific but multiple	MYB41	Myb domain protein 41	GO3	abscisic acid stimulus	TAIR
At4g28140		CU651566_18.1	5e-28	Multiple	AP2TF	AP2 domain transcription factor, putative	GO3	Salinity	7
At4g28250		Mt4g028640	3e-37	Less specific	EXPB3	β-expansin/allergen protein, putative	GO13	Salinity	7
At4g28350		Mt2g013720	0	Specific	LRK	Lectin receptor-like Ser/Thr kinase	GO4	Drought, heat	10
At4g28450		Mt1g022960	0	Very specific	SOF1L	SOF1-like protein (rRNA processing)	GO17	Drought, heat	10
At4g29670.2		Mt6g092700	2e-77	Specific	TRX	Thioredoxins	GO1	ABS	13
At4g29810		Mt6g090470	9e-105	Specific	MKK2	MAP kinase kinase 2	GO4	cold, salt stress	TAIR
At4g29890		Mt4g127130	5e-166	Unique	CMO	Choline monooxygenase	GO15	Salt	AtGI
At4g30190		Mt4g127710, Mt3g108800	0	Very specific but two genes, P-type H+-ATPase	AHA2	H+-transporting ATPase type 2	GO2	Salinity	7
At4g30270		Mt7g093530	2e-134	Multiple, Syringolide-induced protein 19-1-5	MERI5B	Xyloglucan endo-1,4-ß-D-glucanase precursor	GO11	Drought/dehydration	4
At4g30470		Mt5g029990	2e-59	Specific	CCR	Cinnamoyl-CoA reductase	GO7	Drought, heat	10
At4g30490		Mt1g012370	1e-26	Specific, similar to At4g28070	ATPase	AFG1-like ATPase family protein	GO2	Drought, heat	10
At4g30580		Mt5g043620	2e-122	Unique, Lysophosphatidic acid acyltransferase	ATS2	Phospholipid/glycerol acyltransferase family protein	GO9	Salinity	6
At4g30650		Mt4g130660	6e-28	Less specific	CSRP	Hydrophobic protein, putative / low temperature and salt responsive protein	GO18	Cold	2
At4g30660		Mt4g130670	3e-25	Specific	N/A	hydrophobic protein	GO18	cold, salinity	TAIR
At4g30800		Mt8g076830, Mt4g116410	4e-83	Specific but multiple	RPS11B	Ribosomal protein S11-like	GO8	cold, mannitol, NaCl	1
At4g30950		Mt4g130980	0	Unique	FAD6	Omega-6 fatty acid desaturase	GO9	Cold	AtGI
At4g30960		Mt4g131060	0	Specific	CIPK6	SOS2-like protein kinase	GO4	Drought, heat	10
At4g31800		Mt4g007060	5e-60	Multiple	WRKY18	WRKY18 transcription factor	GO3	ROS	3
At4g31870.1	2	Mt1g014210	7e-97	Multiple	GPX7	Glutathione Peroxidase 7	GO1	ABS	13
At4g31990		Mt4g080140	1e-117	Specific	AAT3	Asparatate aminotransferase 5	GO8	Cold	TAIR
At4g32150		Mt5g089370	1e-108	Specific	VAMP711	Vesicle-associated membrane protein 711	GO18	salt stress	TAIR
At4g32190		Mt1g012620	1e-134	Very specific	MHCB	Myosin heavy chain-B	GO18	Cold	1
At4g32250		Mt1g012610	0	Unique	PK	Protein kinase-like	GO4	Drought	18
At4g32320.1		Mt3g107060	3e-115	Unique	APX6	Ascorbate Peroxidase	GO1	ABS	13
At4g32360		Mt8g103060, Mt8g103200	0	Unique	MFDR	NADP adrenodoxin-like ferredoxin reductase	GO17	Drought	AtGI
At4g32830		Mt8g040300	7e-125	Specific but multiple, duplication in Mt	AUR1	Serine/threonine protein kinase	GO4	Drought	18
At4g33000		Mt1g016430	5e-100	Multiple	CBL10	Calcineurin B-like protein 10	GO4	Drought	18
At4g33010		Mt1g016230	0	Unique, Glycine dehydrogenase [decarboxylating], mitochondrial precursor (Glycine decarboxylase) (Glycine cleavage system P-protein)	GDH	Glycine dehydrogenase	GO8	Salinity	7
At4g33040	3	Mt1g015890	8e-41	Specific	GLR	Glutaredoxin	GO1	Drought	18
AT4G33050		Mt2g039910	8e-161	Specific	EDA39	Calmodulin-binding family protein	GO4	ROS	3
At4g33070		Mt7g069540	0	Specific but multiple	PDC1	Pyruvate decarboxylase-1	GO18	Cold	2
At4g33150		Mt4g124470	0	Unique, Bifunctional lysine-ketoglutarate reductase/saccharopine dehydrogenase	LKR	Lys-ketoglutarate reductase / saccharopine dehydrogenase	GO8	Drought, heat	10
At4g33490		Mt8g094590	2e-153	Specific but multiple	NucL	Nucellin-like protein	GO8	Drought, heat	10
At4g33950		Mt8g079560	0	Specific	OST1	Open stomata 1	GO4	water deprivation, osmotic stress, salt stress, ABA	TAIR
At4g33980		Mt1g019360	1e-07	Low E, Uncertain	N/A	Unknown protein	GO18	ABA, drought	14
At4g34000		Mt3g101780	6e-73	Multiple, BZIP transcription factor 6	ABRE/ABF3	ABA-responsive element-binding protein	GO3	Drought, heat	10
At4g34010		NA			N/A	Unknown protein	GO18	cold, mannitol, NaCl	1
At4g34150		AC151525_15.1	5e-61	Specific	C2P	C2 domain-containing protein	GO18	Cold	TAIR
At4g34190		Mt3g109410	0.017	Low E, Uncertain	SEP1	Stress enhanced protein 1	GO18	Drought	18
At4g34240		Mt8g094600	7e-134	Specific	ALDH3	Aldehyde dehydrogenase 3	GO5	water deprivation, abscisic acid stimulus	TAIR
At4g34710		Mt4g071940	0	Very specific	ADC2	Arginine decarboxylase 2	GO17	osmotic stress, oxidative stress, salt stress, ABA	TAIR
At4g34990		Mt4g073420	2e-86	Specific	MYB32	Myb domain protein 32	GO3	salt stress, abscisic acid stimulus	TAIR
At4g35000.1		Mt4g073410	9e-138	Specific	APX3	L-ascorbate peroxidase 3	GO1	ABS	13
At4g35090.1		Mt8g011780	0.094	Low E, Uncertain	Cat2	Catalase	GO1	ABS	13
At4g35100		Mt3g118010	5e-170	Specific	PIP3	Plasma membrane intrinsic protein 3	GO2	salt stress	TAIR
At4g35300		Mt3g118530	0	Specific, match At ID	TMT2	Sugar transport protein, putative	GO2	Drought, heat	10
At4g35480		Mt5g024730	1e-28	Multiple	RHA3B	RING-H2 finger protein	GO3	Cold	1
At4g35580		Mt3g093050	7e-89	Multiple	NAML	NAM/CUC2-like protein	GO3	Drought, heat	10
At4g35770		Mt5g023170	3e-52	Less specific	SEN1	Senescence-associated protein	GO6	cold, mannitol, NaCl	1
At4g35790		Mt5g023050	0	Specific but multiple	PLD	phospholipase D	GO6	Drought, heat	10
At4g35940		Mt1g025620	6e-11	Low E, Uncertain	GRP	Glu-rich protein, putative	GO18	Drought, heat	10
At4g35970		Mt5g022510	2e-116	Specific	APX5	L-ascorbate peroxidase 5	GO1	stresses	AtGI
At4g36010		Mt5g022310	3e-110	Specific	TMT	Thaumatin-like protein	GO6	Drought, heat	10
At4g36020		Mt8g075560	2e-59	Specific	CSDP1	Cold shock domian protein 1	GO6	cold	TAIR
AT4G36040		Mt5g022130	1e-30	Multiple	J11	DNAJ heat shock N-terminal domain-containing protein	GO8	ROS	3
At4g36220		Mt5g021390	0	Specific, Aldehyde 5-hydroxylase	FAH1	Ferulate-5-hydroxylase	GO7	cold, mannitol, NaCl	1
AT4G36600		Mt5g020520	9e-20	Less specific, 51 kDa seed maturation protein	LEA3	LEA domain-containing protein	GO16	ABS, ROS	3
At4g36670		Mt8g077890	0	Specific, Sorbitol-like transporter	ManT	Sugar transporter-like protein	GO2	Cold	1
At4g36680		Mt2g103550	4e-40	Less specific	PPRP	Membrane-associated salt-inducible protein like, pentatricopeptide (PPR) repeat-containing protein	GO18	Salt	AtGI
At4g36730		Mt8g077950	1e-72	Specific, BZIP transcriptional repressor ROM1	GBF1	G-box binding factor 1	GO3	Drought	18
At4g36850		Mt5g019120	3e-141	Specific	PQLP	PQ-loop repeat family protein	GO18	Drought	18
At4g36930		Mt5g017040	3e-41	Less specific	SPT	Transcription factor of the bHLH protein family	GO3	cold	TAIR
At4g37220		AC233653_1009.1	5e-79	Specific	CAP	Cold acclimation protein homolog	GO6	abiotic stress, ABA	12
At4g37260		Mt5g016510	1e-79	Specific but multiple	MYB73	Myb domain protein 73	GO3	salt stress, abscisic acid stimulus	TAIR
At4g37360		Mt5g016440	1e-164	Multiple, duplication in At	CYP81D2	Cytochrome P450-like protein family 81 subfamily D	GO6	Drought	18
At4g37370		Mt5g016410	2e-163	Multiple, duplication in At	CYP81D8	Cytochrome P450-like protein family 81 subfamily D	GO6	Salinity	7
At4g37450		Mt4g095280	4e-05	Low E, Uncertain	AGP18	Probable arabinogalactan protein	GO18	cold, mannitol, NaCl	1
At4g37470		Mt4g095310	8e-152	Specific	ABH	Hydrolase, alpha/beta fold family	GO15	Salinity	6
At4g37540		Mt4g095600	1e-70	Specific	LBD39	Lateral organ boundaries (LOB) domain protein 39	GO16	cold, mannitol, NaCl	1
At4g37590		Mt5g015790	0	Specific	NPH3	Phototropic response protein family	GO6	Salinity	7
At4g37760		Mt4g092640	0	Unique	SQMO	Squalene epoxidase-like	GO6	Cold	1
At4g37840		Mt8g102460	2e-101	Specific	HXK	hexokinase	GO11	cold, drought, heat, osmotic stress, oxidative stress, salt stress	TAIR
At4g37930		Mt5g030950	0	Specific but multiple homologs	SHMT1	Serine transhydroxymethyltransferase	GO15	cold	TAIR
At4g37980		Mt5g031310, Mt8g068190	3e-160	Multiple, duplication in both At and Mt	ELI3-1	NAD-dependent mannitol dehydrogenase 1, Elicitor-activated gene 3	GO11	abiotic stress	AtGI
At4g37990		Mt8g068190, Mt5g031250	3e-149	Multiple	ELI3-2	NAD-dependent mannitol dehydrogenase 2, Elicitor-activated gene 3	GO11	abiotic stress	AtGI
At4g38060		Mt5g032070	2e-15	Low E, Uncertain	N/A	Unknown protein	GO18	cold, mannitol, NaCl	1
At4g38410		Mt3g117190	6e-05	Low E, Uncertain	ERD10	Dehydrin, similar to dehydrin ERD10	GO6	Salinity	6
At4g38580		Mt3g117890	2e-75	Specific	ATFP6	Farnesylated protein	GO6	Cold	2
At4g38620		Mt4g073420	8e-94	Specific	MYB4	Myb domain protein 4	GO3	abscisic acid stimulus	TAIR
At4g38630		Mt5g022440	2e-101	Specific	RPN10	Regulatory particle non-ATPaes 10	GO18	heat, salt stress, ABA	TAIR
At4g38660		Mt5g022350	3e-107	Specific	TMT	Thaumatin-like protein	GO6	Drought	18
At4g38690		Mt5g076260	0.58	Low E, Uncertain	PLC	Phospholipase C	GO4	Drought	18
At4g38840		Mt4g072560	4e-31	Fairly specific		SAUR-like auxin-responsive protein	GO5	cold	TAIR
At4g39090		Mt4g071060	6e-174	Specific	RD19A	Cysteine proteinase RD19a/ thiol protease	GO8	Drought	AtGI
At4g39130		Mt3g117190	1e-09	Low E, Uncertain	LEA	Dehydrin family protein	GO6	water deprivation	TAIR
At4g39210		Mt4g070430	0	Specific	APL3	Glucose-1-phosphate adenylyltransferase	GO6	Drought, heat	10
At4g39230		Mt3g116840	7e-161	Specific	IFR	Leucoanthocyanidin reductase, Isoflavone reductase	GO7	Drought	18
At4g39260		Mt4g070190	3e-40	Multiple	CCR1	Circadian rhythm 1	GO18	Cold	TAIR
At4g39710		Mt8g091410	5e-91	Specific	PPIase	Peptidyl-prolyl cis-trans isomerase	GO8	Drought	18
At4g39800		Mt3g087590	0	Specific	IPS	Myo-inositol-1-phosphate synthase	GO15	Salinity	7
At4g39970		AC235753_18.1	4e-37	Low E, Uncertain	HADH	Haloacid dehalogenase-like hydrolase family	GO15	Drought	18
At4g40010		Mt3g086940	9e-154	Specific but multiple	SRK2F	SNF1-related protein kinase 2.7	GO4	osmotic stress, salt stress	TAIR
At5g01210		Mt4g015180	6e-180	Specific	ABT	Anthranilate N-benzoyltransferase	GO17	cold, mannitol, NaCl	1
At5g01410		Mt2g017520	3e-179	Very specific	PDX1	Pyridoxine biosynthesis 1.3	GO17	salt stress	TAIR
At5g01600		Mt4g014540	1e-106	Specific	FER1	Ferritin 1	GO1	Drought/dehydration	4
At5g01810		AC231371_11.1	2e-149	Multiple	CIPK15, SOS2	CBL-interacting serine/threonine-protein kinase 15, SOS2-like protein kinase	GO4	Drought	16
At5g01930		Mt8g005670, Mt8g005270	0	Specific	BMH	(1-4)-beta-mannan endohydrolase-like protein	GO11	Drought	18
At5g02020		Mt7g065150	1e-26	Low E, Uncertain	SIS	Salt induced serine rich	GO18	Salinity	7
At5g02500		Mt7g024580, Mt7g024390, Mt7g099680, Mt4g130540	0	Multiple	HSP70-1	Heat shock cognate 70 kDa protein 1	GO6	cold, heat	TAIR
At5g02620		Mt2g096190	0	Specific	ANK	Ankyrin-like protein	GO18	Drought, heat	10
At5g02640		Mt7g100340	2e-25	Specific	N/A	Unknown protein	GO18	Drought	18
At5g02840		Mt7g038290	7e-61	Specific	LCL1	LHY/CCA1-like 1	GO3	salt stress, abscisic acid stimulus	TAIR
At5g03280		Mt7g101410	0	Specific	EIN2	Ethylene insensitive 2	GO4	heat, osmotic stress, oxidative stress, salt stress	TAIR
At5g03630.1		Mt1g090020	0.75	Low E, Uncertain	MDAR5	Monodehydroascorbate Reductase	GO6	ABS	13
At5g03740		Mt4g055440	1e-19	Less specific	HDAC	HD2-type histone deacetylase	GO15	water deprivation, salt stress, ABA	TAIR
At5g03840		Mt7g104460	2e-87	Specific	TFL1	Terminal flower	GO15	cold, mannitol, NaCl	1
At5g04250		Mt1g063900	4e-89	Unique	OLCysP	OTU-like cysteine protease family protein	GO18	ABA, drought	14
At5g04310		Mt6g021950	1e-153	Multiple	PL	Pectate lyase	GO13	Drought	18
At5g04340		Mt1g018420	5e-37	Multiple	C2H2	C2H2 zinc finger DNA-binding protein	GO3	Cold	2
At5g04530		Mt4g062170	5e-136	Specific	KCS	Fatty acid elongase 3-ketoacyl-CoA synthase	GO6	Drought, heat	10
At5g04590		Mt4g017320	0.32	Low E, Uncertain	SIR	Sulfite reductase	GO17	cold	TAIR
At5g04700		Mt5g091220	7e-51	Less specific	N/A	Unknown protein	GO18	Drought	18
At5g04810		Mt4g075270	6e-69	Less specific	PPRP	Pentatricopeptide (PPR) repeat-containing protein	GO18	Drought, heat	10
At5g05110		Mt8g041410	3e-61	Specific	CysPI	Cys proteinase inhibitor-like protein	GO8	Drought, heat	10
At5g05220		Mt5g067740	2e-17	Specific	N/A	Unknown protein	GO18	abiotic stress, ABA	12
At5g05270		Mt1g115820	0.0001	Low E, Uncertain	CFI	Chalcone-flavanone isomerase	GO7	Drought	18
At5g05290		Mt5g075320	7e-114	Specific	EXPA2	Arabidopsis thaliana expansin A2	GO13	ABS, ROS	3
At5g05340		Mt3g094630	2e-155	Specific but multiple	PER	Peroxidase	GO6	Drought	18
At5g05410		Mt5g083340	8e-28	Multiple	DREB2A	Dehydration-responsive element-binding protein 2A	GO3	Drought, heat	10
At5g05580		Mt4g015630	0	Specific	FAD8	Omega-3 fatty acid desaturase	GO9	Cold	AtGI
At5g06060		AC233662_54.1	1e-16	Less specific	ADH	Short chain alcohol dehydrogenase-like	GO15	Drought	18
At5g06070		Mt4g021270	4e-23	Less specific	RAB	Rabbit ears	GO16	cold	TAIR
At5g06290.1		AC146630_2.1	3e-128	Specific but two homolog, duplication in Mt? 2-Cys peroxiredoxin	2-cys PrxR B	2-cys peroxiredoxin	GO1	ABS	13
At5g06320		Mt6g071400	5e-17	Less specific	NHL3	Harpin-induced family protein	GO6	ROS	3
AT5g06600		Mt3g079840	0	Specific but multiple	UBP12	Ubiquitin carboxyl-terminal hydrolase	GO8	Salinity	7
At5g06760		Mt7g093170	9e-26	Less specific	LEA1	LEA group 1, Late embryogenesis abundant group 1 domain-containing protein	GO16	ABS, ROS	3
At5g07050		Mt8g041390	2e-150	Specific	MTN21	Nodulin MTN21 family protein	GO16	Drought	18
At5g07070		Mt5g075060	0	Specific but multiple	CIPK2, SOS2	CBL-interacting protein kinase 2, SOS2-like protein kinase	GO4	Drought	16
At5g07330		Mt5g006540	1e-22	Specific, duplication in Mt?	N/A	Unknown protein	GO18	ABS, ROS	3
At5g07920		Mt8g094940	0	Very specific	DGK1	Diacylglycerol kinase 1	GO4	Drought, heat	10
At5g07990		Mt3g025230	0	Specific, Flavonoid 3'-hydroxylase	TT7	Flavonoid 3' 5'-hydroxylase, Transparent testa 7	GO7	Drought	18
At5g08590		Mt8g095330	0	Specific	SRK2G	Arbidopsis serine / threonine kinase 2	GO4	osmotic stress, salt stress	TAIR
At5g08610		AC233680_24.1	4e-104	Very specific	RH26	RNA helicase-like protein	GO18	cold, mannitol, NaCl	1
At5g08640		Mt3g072820	4e-142	Specific	FLS	Flavonol synthase	GO7	Drought	18
At5g08650		Mt7g009740	8e-178	Specific	LEPA	GTP-binding protein LepA homolog	GO18	Salinity	7
At5g09590		Mt4g092920	0	Specific	HSC70-5	Heat shock protein 70	GO6	Drought, heat	10
At5g09650		Mt2g010430	3e-148	Unique	Ppase	pyrophosphatase	GO15	Drought	18
At5g09730		Mt2g008240	0	Specific but Three genes	BXL3	Xylan 1,4-beta-xylosidase	GO11	Drought	18
At5g10030		Mt3g087940	2e-158	Specific	TGA4	TGACG motif-binding factor 4	GO3	cold	TAIR
At5g10930		Mt1g013700	0	Specific	CIPK5	Serine / threonine protein kinase	GO4	Drought, heat	10
At5g11150		Mt5g089370	2e-104	Specific	VAMP713	Vesicle-associated membrane protein 713	GO18	salt stress	TAIR
At5g11160		Mt3g106780	7e-96	Specific	APT5	Adenine phosphoribosyltransferase	GO10	Drought	18
At5g11260		Mt7g057160	4e-18	Less specific	HY5	TGACG-motif-binding protein	GO3	Drought	18
At5g12020		Mt3g104780	1e-32	Multiple, duplication in At?	HSP17.6-CII	Heat shock protein 17.6-II	GO6	Drought, heat	10
At5g12030		Mt3g104780	6e-33	Multiple, duplication in At?	HSP17.6A	Heat shock protein 17.6A	GO6	Drought, heat	10
At5g12110		Mt5g088660	3e-84	Specific	EEF1BALPHA1	Elongation factor 1B alpha-subunit	GO3	Drought, heat	10
At5g12250		Mt7g089120	0	Multiple	TUB6	Beta-6 tubulin	GO15	cold	TAIR
At5g12860		Mt2g009220	1e-144	Unique	DIT1	2-oxoglutarate/malate translocator-like protein	GO2	Drought	18
At5g13170		Mt7g005690	1e-98	Specific	MTN3	Senescence-associated protein	GO18	Drought, heat	10
At5g13200		Mt7g083570	3e-96	Specific, match At ID	GRAM	GRAM domain-containing protein / ABA-responsive protein-related	GO18	ABA	AtGI
At5g13360		Mt2g081860	8e-161	Specific	GH3	Auxin responsive GH3	GO18	ABA, drought	14
At5g13490		Mt8g036880	0	Very specific	AAC2	Adenosine nucleotide translocator	GO2	Salinity	7
At5g13630		Mt5g034640	0.79	Low E, Uncertain	GUN5	Cobalamin biosynthesis protein, Genomes uncoupled 5	GO12	Salinity	7
At5g13750		Mt3g010850	1e-168	Specific, match At ID	ZIFL1	Zinc induced facilitator-like 1	GO2	ABA, drought	14
At5g13800		Mt3g034670	2e-178	Unique	ABH	Hydrolase, alpha/beta fold family	GO18	Drought	18
At5g13820		Mt5g080010	7e-95	Specific	TBP1	Telomeric DNA-binding-1	GO15	ABA, drought	14
At5g13930		Mt7g084300	0	Specific but multiple	CHS	Chalcone synthase	GO7	Drought, oxidative stress	18
At5g14070.1		Mt7g026770	7e-43	Specific	GLR	Glutaredoxin	GO1	ABS	13
At5g14180		Mt6g023740	2e-136	Specific	LIP	Lipase family protein	GO9	Drought/dehydration	4
At5g14270		Mt2g018270	1e-44	Multiple	BET9	Kinase-like RING3 protein	GO18	Drought, heat	10
At5g14660		Mt2g103430	2e-19	Less specific	PDF1B	Peptide deformylase 1B	GO8	Drought	18
At5g14700		Mt5g029990	2e-29	Less specific	CCR	Cinnamoyl CoA reductase	GO7	Drought	18
At5g14800		Mt7g090160	6e-133	Unique	P5CR	Pyrroline-5-carboxylate reductase	GO8	Drought, heat	10
At5g15250		Mt7g010800	0	Unique	FTSH6	FtsH protease	GO8	Drought, heat	10
At5g15310		Mt7g011170	7e-103	Specific but multiple	MYB16	Myb domain protein 16	GO3	salt stress, abscisic acid stimulus	TAIR
At5g15450		Mt7g012820, Mt6g013660	0	Specific	APG6	Albino and pale green 6	GO6	Drought, heat	10
At5g15780		Mt7g016950	3e-35	Specific	PRP	Pro-rich protein	GO17	Salinity	7
At5g15850		Mt4g128930	3e-58	Multiple	COL1	CONSTANS-like 1	GO3	Cold	1
At5g15960		Mt6g044390	0.006	Low E, Uncertain	KIN1	Cold-and ABA-inducible protein kin1	GO6	Cold	2
At5g15970		AC235005_12.1, Mt7g051400, AC235009_23.1	0.25	Low E, Uncertain	COR6.6	Cold-regulated protein COR6.6, LEA	GO6	Drought, salt, cold	8
At5g16570		Mt3g065250, Mt6g071070	0	Specific but multiple	GLN1;4	Glutamine synthetase 1;4	GO8	Salinity	7
At5g16710.1		Mt5g040430	0.16	Low E, Uncertain	DHAR3	Dehydroascorbate Reductase	GO5	ABS	13
At5g17050		Mt4g128690	3e-138	Specific	UGT	UDP-glucoronosyl/UDP-glucosyl transgerase family protein	GO7	Drought	18
At5g17170		Mt5g008050	8e-82	Unique	RBD	Rubredoxin family protein	GO18	Drought/dehydration	4
At5g17220		Mt3g064700	4e-74	Specific	GSTF12	Glutathione S-transferase	GO1	Drought, heat	10
At5g17310		Mt5g077000	0	Unique	UGPP	UDP-glucose pyrophosphorylase	GO6	Salinity	7
At5g17460		Mt5g087440, Mt5g086010	2e-112	Specific but two homologs	N/A	Unknown protein	GO18	Salinity	7
At5g17860		Mt7g086690	2e-147	Specific	CAX7	Calcium:sodium antiporter, Cation exchanger 7	GO2	Drought	18
At5g17870		Mt3g110640	4e-18	Specific	RP6	Ribosomal protein 6 precursor	GO8	Drought	18
At5g18100.1		Mt6g029200	8e-75	Specific	CSD3	Superoxide Dismutase	GO1	ABS	13
At5g18180		Mt3g005930	0.009	Low E, Uncertain	Gar1	Gar1 RNA-binding region family protein	GO10	Salinity	6
At5g18450		Mt1g023170	3e-41	Specific	DREB2G	Dehydration-responsive element-binding protein 2G	GO3	Drought	AtGI
At5g18820		Mt4g084130	0	Specific	EMB3007	Chaperonin 60 alpha chain, Embryo defective 3007	GO16	Drought, heat	10
At5g19600		Mt6g086170	0	Specific	SULTR3;5	Sulphate transporter	GO2	Drought	18
At5g19690		Mt1g114250	0	Very specific	STT3A	Staurosporin and temperature sensitive 3-like A	GO6	salt stress	TAIR
At5g19860		Mt8g085580	3e-59	Specific	N/A	Unknown protein	GO18	Drought	18
At5g19890		Mt2g040000	2e-104	Specific	PER	Peroxidase	GO6	cold, mannitol, NaCl	1
At5g20150		Mt4g114550	5e-85	Specific	SPX	SYG1/Pho81/XPR1 domain-containing protein	GO18	Drought/dehydration	4
At5g20230		Mt4g114870	1e-23	Specific	BCB	Plastocyanin like	GO6	ABS, ROS	3
At5g20250		Mt4g115330	0	Specific	DIN10	Glycosyl hydrolase family 36*, Dark inducible 10	GO14	Drought	18
At5g20270		Mt4g115580	6e-133	Very specific	HHP1	Heptahelical transmembrane protein	GO17	salt stress	TAIR
At5g20350		Mt4g116160	0	Very specific	TIP1	TIP growth defective 1	GO18	salt stress	TAIR
At5g20500.1		Mt2g038560	3e-49	Multiple	GLR	Glutaredoxin	GO1	ABS	13
At5g20520		Mt7g017430	1e-06	Low E, Uncertain	WAV2	Wavy growth 2	GO18		TAIR
At5g20630		Mt8g020590	2e-71	Specific	GLP3	Germin-like protein	GO6	Drought/dehydration	4
At5g20720		Mt4g124910	4e-111	Specific	CPN20	Chaperonin 20	GO18	Cold	TAIR
At5g20830		Mt4g124660	0	Specific but multiple	SUS1	Sucrose-UDP glucosyltransferase	GO11	Salinity	7
At5g21170		Mt5g088270	8e-97	Specific	SPKBS	SNF1-related protein kinase regulatory beta subunit 1	GO18	Drought	18
At5g22290		Mt2g086880	9e-74	Specific	ANAC089	Arabidopsis NAC domian containing protein 89	GO3	Drought, heat	10
At5g22360		Mt5g089370	4e-71	Specific	VAMP714	Vesicle-associated membrane protein 714	GO18	salt stress	TAIR
At5g22940		Mt4g057500	2e-169	Unique	EXOST	Secondary cell wall-related glycosyltransferase family 47	GO13	Drought	18
At5g23050		Mt8g085680, Mt8g086050	0	Specific	AAE17	Acetyl-CoA synthetase-like protein	GO15	Drought, heat	10
At5g23120		AC148471_30.1	0.95	Low E, Uncertain	HCF136	Photosystem II stability / assembly factor	GO12	Drought	18
At5g23310		AC148471_7.1	0.23	Low E, Uncertain	FSD3	Superoxide dismutase [Fe]	GO1	stresses	AtGI
At5g23590		Mt3g027580	6e-10	Less specific	DnaJ	DNAJ heat shock N-terminal domain-containing protein	GO8	Drought/dehydration	4
At5g23660		Mt7g005690	8e-91	Specific	MTN3	MtN3-like protein	GO18	Salinity	7
At5g23730		Mt5g085250	2e-33	Specific	TNSD	Transducin family protein	GO16	Drought	18
At5g23860		Mt1g101130	0	many homologs	TUB8	Tubulin bata-8	GO15	Drought	18
At5g24155		Mt4g092640	3e-10	Low E, Uncertain	SQMO	Squalene monooxygenase	GO9	abiotic stress, ABA	12
At5g24800		Mt1g008990	4e-39	Less specific	BZIP9	Basic leucine zipper 9	GO3	Drought, heat	10
At5g24870		Mt1g009680	2e-63	Specific	RZF	RING finger-like protein	GO3	Drought, heat	10
At5g25110		Mt1g013700	1e-177	Specific	CIPK25	Serine / threonine protein kinase-like protein	GO4	Drought, heat	10
At5g25370		Mt2g103730, Mt3g107360, Mt3g107320, Mt3g107000	0	Specific but multiple homologs	PLDALPHA3	Phosphlipase D alpha 3	GO18	water deprivation, salt stress, abscisic acid stimulus	TAIR
At5g25390		Mt2g103700	6e-46	Less specific	SHN2	AP2 domain containing protein	GO3	Drought, heat	10
At5g25450		Mt1g011880	1e-44	Specific	UCR	Ubiquinol–cytochrome-c reductase	GO2	Drought, heat	10
At5g25610		Mt1g008500	8e-101	Specific	RD22	Dehydration-responsive protein RD22 precursor	GO6	Salinity	7
At5g25940		Mt1g007360	1e-14	Less specific	N-93	Soybean early nodulin 93	GO15	Drought	18
At5g26220		Mt3g109250	1e-98	Specific	CHAC	ChaC-like family protein, similar to E. coli pH-independent Ca2+/H+ antiporter	GO2	Salinity	6
At5g26330		Mt1g104800	1e-56	Unique	CBP	Copper binding-like protein, Plastocyanin-like domain-containing protein	GO2	Drought	18
At5g26660		Mt1g085040	2e-83	Multiple	MYB4	Transcription factor	GO3	cold, mannitol, NaCl	1
At5g26990		Mt1g083780	4e-50	Specific	Fb2	similar to fiber protein Fb2	GO6	water deprivation	TAIR
At5g27150		Mt7g114250, Mt4g118770	0	Specific	NHX1	NA+ / H+ exchanger	GO2	salt stress	TAIR
At5g27290		Mt7g114070	3e-152	Unique	N/A	Unknown protein with a DNA ligase domain, Similar to stress regulated protein	GO18	Salinity	6
At5g27420		Mt1g082550	1e-64	Less specific	ZF	Zinc-finger protein	GO3	ROS	3
At5g27600		Mt1g104810	0	Specific	LACS7	Long-chain acyl-CoA sythetase 7	GO9	salt stress	TAIR
At5g28050		Mt4g124190	3e-89	Specific but multiple	DCDA	Deoxycytidine deaminase	GO10	Drought	18
At5g28540		Mt7g099680, Mt4g130540, Mt7g024580, Mt7g024390	0	Specific but multiple	BP1	Luminal binding protein 1	GO6	Drought, heat	10
At5g28840		Mt7g115080	0	Unique	GME	Epimerase/dehydratase	GO11	Drought	18
At5g29000		Mt1g080330	5e-69	Specific	MYBTF	CDPK substrate protein 1, MYB family transcription factor	GO3	Drought, heat	10
At5g35410		Mt4g114670	0	Specific	CIPK24, SOS2	CBL-interacting protein kinase 24, serine/threonine protein kinase	GO4	Salt	AtGI
At5g35750		Mt5g097410	0	Specific	AHK2	Histidine kinase	GO4	water deprivation, osmotic stress, salt stress, ABA	TAIR
At5g37260		Mt3g064500	2e-35	Specific	CIR1	MYB family transcription factor Circadian 1	GO3	salt stress	TAIR
At5g37500		Mt5g077770	0	Unique	GORK	Guard cell outward rectifying K+ channel	GO2	Drought	AtGI
At5g37540		Mt3g065160	4e-175	Specific	NDBP	Nucleoid DNA-binding protein	GO8	Drought, heat	10
At5g37600		Mt3g065250, Mt6g071070	0	Specific but multiple genes	GSR1	Glutamine synthetase	GO8	Drought	18
At5g37670		Mt5g078040	2e-42	Less specific	HSP15.7-CI	Cytosolic class I small heat shock protein	GO6	Drought, heat	10
At5g37770		Mt5g079340	8e-46	Multiple	TCH2	Calmodulin-related protein in response to touch, darkness and temperature shock	GO4	Salinity	6
At5g38280		Mt7g082470	4e-123	Specific	PRK	Receptor serine/threonine kinase	GO4	Drought	18
At5g38470		AC233655_47.1	2e-97	Specific	RAD23	DNA repair protein RAD23	GO10	cold	TAIR
At5g38530		Mt3g049410	1e-19	Less specific	TrpS	Tryptophan synthase-related protein	GO8	Salinity	6
At5g39580		Mt2g008710	2e-121	Specific	PER24a	Peroxidase ATP24a	GO8	cold, mannitol, NaCl	1
At5g39610		Mt6g012670	3e-88	Less specific	AtNAC6	NAC transcription factor	GO3	ABA, drought	14
AT5G39670		Mt4g127560	1e-42	Less specific	CaEF	Calcium-binding EF-hand protein	GO4	ROS	3
At5g39950		Mt7g009070	2e-50	Multiple	TRXH	Thioredoxin h	GO1	Drought	18
At5g40280		Mt7g024540	5e-25	Very specific	ERA1	Enhanced response to ABA 1	GO5	water deprivation	TAIR
At5g40370.1		Mt3g077570	2e-44	Multiple	GLR	Glutaredoxin	GO1	ABS	13
At5g40420		Mt6g005040	1e-23	Specific	OLEO2	Gly-rich protein/oleosin	GO16	ABS, ROS	3
At5g40760		Mt7g037440	0	Unique	G6PD6	Glucose-6-phosphate dehydrogenase	GO11	Drought, heat	10
At5g41010		Mt2g063190	1e-28	Unique	RNAP	DNA-directed RNA polymerases I, II and III, 7-kDa subunit, putative	GO10	Salinity	6
At5g41170		Mt2g035630	2e-99	Less specific	PPRP	Pentatricopeptide (PPR) repeat-containing protein	GO18	Salt	AtGI
At5g42040		Mt1g016750	3e-96	Unique	RPN12	26S proteasome non-ATPase regulatory subunit, putative,	GO8	Salinity	6
At5g42180		Mt1g025980	6e-155	Multiple	PER64	Peroxidase	GO6	Drought	18
At5g42800		AC235668_2.1	1e-162	Very specific	DFR	Dihydroflavonol 4-reductase	GO7	Drought, heat	10
At5g42900		Mt1g019360	4e-21	Less specific	COR27	Cold regulated gene 27	GO18	ABA, drought	14
At5g42910		Mt3g101780	1e-23	Less specific	BZIP15	Basic leucine zipper transcription factor	GO3	ABA, stress	AtGI
At5g43170		Mt1g018420	5e-30	Less specific	ZF3	ZINC-FINGER PROTEIN 3	GO3	cold, salinity	TAIR
At5g43260		Mt3g085300	2e-48	Specific	DIP1	Drought-induced protein 1	GO18	Drought	AtGI
At5g43920		Mt5g090420	4e-135	Specific	WD40	WD-40 repeat protein	GO18	Drought, heat	10
At5g44110		Mt1g084720	3e-73	Specific	POP1	NBD-like protein	GO6	Cold	1
At5g44120		Mt1g072600, Mt1g072610	2e-74	Multiple	CRA1	Legumin-like protein Cruciferina	GO5	Drought/dehydration	4
At5g44420		Mt3g020340	3e-06	Low E, Uncertain	LCR77	Low-molecular-weight cysteine-rich 77	GO6	Salinity	7
At5g44730		Mt2g035440	9e-133	Very specific	HADH	Haloacid dehalogenase-like hydrolase family protein	GO15	AtGI	AtGI
At5g45160		Mt4g097030	0.8	Low E, Uncertain	RHD3	Root hair defective 3 GTP-binding family protein	GO18	Drought	18
At5g45340		Mt8g072260	0	Very specific	CYP707A3	Cytochrome P450-like protein family 707 subfamily A	GO5	water deprivation	TAIR
At5g45800		Mt8g086490, AC231371_28.1	6e-169	Many homologs	MEE62	Receptor kinase-like protein	GO4	Drought	18
At5g45910		Mt2g015650	4e-110	Specific	GDSL	GDSL-motif lipase/hydrolase family protein	GO9	Salinity	6
At5g45930		Mt2g015390	0	Unique	CHLI2	Mg-protoporphyrin IX chelatase	GO12	Drought	18
At5g46050		Mt1g075440	0	Specific but multiple	PTR3	Peptide transporter protein 3	GO2	Drought	18
At5g46110		Mt5g044220	2e-161	Very specific	APE2	Triose phosphate/phosphate translocator	GO2	Drought	18
At5g46170		Mt2g019080	1e-158	Unique	FBP	F-box family protein	GO18	heat acclimation	TAIR
At5g46900		Mt4g101260	4e-29	Multiple	ExtA	Protease inhibitor/seed storage/lipid transfer protein family protein	GO2	Salinity	1
At5g47230		Mt4g100420	3e-38	Fairly specific	ERF5	Ethylene responsive element binding factor 5	GO3	cold	TAIR
At5g47390		Mt4g100630	1e-88	Specific	MYB	Myb family transcription factor	GO3	salt stress, abscisic acid stimulus	TAIR
At5g47450		Mt8g013680	3e-97	Specific	TIP2	Tonoplast intrinsic protein 2	GO2	salt stress	TAIR
At5g47640		Mt5g095740	3e-61	Multiple	HAP3B	CCAAT-box-transcription factor, putative	GO3	Dehydration	1
At5g47910		Mt3g098380, Mt8g095520	0	Specific but multiple	RbohD	Respiratory burst oxidase protein D	GO6	ROS	3
At5g47960		Mt3g086980	1e-99	Specific	SMG1	Ras-related GTP-binding family protein	GO4	Salinity	6
At5g48030		Mt3g027580	4e-160	Specific	GFA2	Gametophytic factor 2	GO8	Drought, heat	10
At5g48150		Mt5g097480	0	Specific	PAT1	GRAS family transcription factor, Phytochrome A signal transduction 1	GO3	Drought	18
At5g48570		Mt8g012340	0	Specific	PPIase	Peptidyl-prolyl cis-trans isomerase	GO8	Drought, heat	10
At5g48870		Mt4g083170	6e-05	Low E, Uncertain	SAD1	Supersensitive to ABA and drought 1	GO6	water deprivation, abscisic acid stimulus	TAIR
At5g49160		Mt6g065580, Mt4g035150	0	Specific but two homologs	MET1	DNA cytosine-5-methyltransferase	GO10	Drought	18
At5g49230		Mt1g083780	2e-43	Specific	HRB1	Hypersensitive to red and blue	GO4	water deprivation	TAIR
At5g49450		Mt4g070860	7e-14	Multiple	BZIP1	bZIP transcirption factor family protein	GO3	ABA, drought	14
At5g49620		Mt2g033170	4e-82	Specific	MYB78	Myb domain protein 78	GO3	salt stress, abscisic acid stimulus	TAIR
At5g49630		Mt8g094290	2e-167	Specific but multiple	AAP6	Amino acid permease 6	GO2	Drought	18
At5g49990		Mt4g106750	0	Specific	XUP	Xanthine / uracil permease family protein	GO2	Drought, heat	10
At5g50160.1		Mt7g038510	1e-74	Specific	FRO8	Ferric reduction oxidase 8	GO18	ABS	13
At5g50360		Mt4g103840	3e-43	Less specific	N/A	Unknown protein	GO18	abiotic stress, ABA	12
At5g50720		Mt3g099010	2e-44	Specific	HVA22	HVA22 homologue E	GO6	cold, water deprivation	TAIR
At5g51070		Mt3g098310	0	Specific	ERD1	ATP-dependent Clp protease ATP-binding subunit	GO6	Drought, heat	10
At5g51100.1		Mt8g039210	1.3	Low E, Uncertain	FSD2	Superoxide Dismutase	GO1	ABS	13
At5g51210		Mt1g090250	5e-20	Less specific	OLEO3	Glycine-rich protein oleosin	GO9	abiotic stress, ABA	12
At5g51460		Mt3g008500	1e-141	Specific	TPP	Trehalose-6-phosphate phosphatase	GO11		AtGI
At5g51540		Mt3g009160	0	Unique	N/A	Unknown protein	GO18	Drought	18
At5g51820		Mt1g102010	0	Specific	PGM1	Phoshoglucomutase	GO12	cold	TAIR
At5g51960		Mt6g068850	1e-36	Unique	SLDH	sorbitol dehydrogenase	GO11	abiotic stress	AtGI
At5g51970		AC229727_19.1	0	Specific	SLDH	sorbitol dehydrogenase	GO11	abiotic stress	AtGI
At5g51990		Mt1g101600	3e-47	Multiple	DREB1D	Dehydration-responsive element-binding protein 1D	GO3	Drought	15
At5g52300		AC235674_15.1	8e-17	Less specific	RD29B	Hydrophilic protein	GO6	Drought, heat	10
At5g52310		AC235674_15.1	2e-05	Less specific	RD29A	Hydrophilic protein	GO6	Salinity	7
At5g52640		Mt1g099840, Mt5g096460, Mt5g096430	0	Multiple	HSP81-1	Heat shock protein	GO6	Drought, heat	10
At5g52660		Mt7g038290	1e-76	Specific	MYB	Myb family transcription factor	GO3	salt stress, abscisic acid stimulus	TAIR
At5g52750		Mt1g099640	4e-14	Multiple	HMAP	Heavy-metal-associated protein	GO2	ROS	3
At5g52880		Mt1g099490	3e-47	Very specific	MYB	Myb-related transcription factor	GO3	Drought	18
At5g53000		Mt3g091640	6e-168	Unique	TAP46	2A phosphatase associated protein of 46 KD	GO18	cold	TAIR
At5g53120		Mt3g091090	0	Specific	SPDS3	Spermidine synthase 3	GO15	Salinity	7
At5g53400		Mt1g008200	7e-101	Very specific	NudC	Similar to nuclear movement protein nudC	GO18	Drought, heat	10
At5g53450		Mt3g091290	0	Unique	ORG1	Protein kinase family	GO4	Salinity	7
At5g53730		Mt3g092790	1e-51	Specific	HIN1	Harpin-responsive family protein	GO18	Drought	18
At5g53760		Mt2g006280	4e-128	Specific	MLO11	Seven transmembrane MLO protein family	GO14	Drought	18
At5g53870		Mt4g078410	1e-35	Less specific	PCYN	Phytocyanin/early nodulin-like protein	GO18	Drought, heat	10
At5g54080		Mt2g009450	0.024	Low E, Uncertain	HGO	Homogentisate 1,2-dioxygenase	GO8	Drought, heat	10
At5g54110		Mt2g081140	8e-94	Specific	MAMI	Membrane-associated mannitol-induced	GO17	osmotic stress	TAIR
At5g54230		Mt4g091490	1e-67	Specific	MYB49	Myb domain protein 49	GO3	salt stress, abscisic acid stimulus	TAIR
At5g54270		Mt2g081090	5e-160	Very specific	LHCB3	Chlorophyll a/b-binding protein	GO12	Drought	18
AT5G54490		Mt2g081580	3e-24	Multiple	PBP1	Calcium-binding EF-hand protein, Pinoid-binding protein 1	GO4	ROS	3
At5g54730		Mt2g082770	3e-123	Specific	WD40	WD40 repeat protein	GO18	ABA, drought	14
At5g54770		Mt4g081130, Mt4g080840	2e-151	Specific but two genes	THI1	Thiazole requiring	GO15	cold	TAIR
At5g55400		Mt5g094160	0	Specific but multiple	FMBL	Fimbrin-like protein, putative	GO18	Salinity	6
At5g55560		Mt5g094390	2e-162	Specific but multiple	MAPK	MAP kinase-like protein	GO4	Drought	18
At5g55990		Mt5g096420	2e-136	Specific	CBL2, SOS3	Calcineurin B-like protein 2, SOS3-like calcium-binding protein 1	GO4	Drought	16
At5g56000		Mt5g096460, Mt5g096430	0	Specific but multiple	HSP81-4	Heat shock protein	GO6	Salinity	7
At5g56030		Mt5g096460, Mt5g096430	0	Specific but multiple	HSP81-2	Heat shock protein 81-2	GO6	Salinity	7
At5g56500		Mt1g090140	7e-144	Specific	RBCC	Rubisco chaperonin	GO8	Drought, heat	10
At5g57050		Mt4g127880	3e-118	Specific	ABI2	Protein phosphatase 2C	GO4	ABA, drought	14
At5g57090		Mt4g127100, Mt7g089360	0	Specific but multiple	EIR1	Auxin transport protein EIR1	GO5	cold, mannitol, NaCl	1
At5g57380		Mt4g127880	3e-118	Very specific	VIN3	Vernalization insensitive 3	GO15	cold	TAIR
At5g57560		Mt7g093530	1e-139	Specific but multiple	TCH4	Cell wall-modifying enzyme	GO13	cold, heat	TAIR
At5g57655		Mt4g128840	8e-140	Unique	XI	Xylose isomerase	GO11	Drought/dehydration	4
At5g57900		Mt4g130620	4e-107	Unique	SKIP1	SKP1 interacting partner 1	GO17	Drought, heat	10
At5g58070		Mt4g131390	2e-93	Specific	LPCLN	Outer membrane lipoprotein	GO2	Drought, heat	10
At5g58330		AC235664_1.1	3e-175	Specific	MDH	Malate dehydrogenase	GO11	Salinity	7
At5g58540		Mt1g084790	1e-94	Specific	PK	Protien kinase family protein	GO4	Salinity	7
At5g58590		Mt6g042530	4e-74	Specific	RANBP1	Ran binding protein 1 homolog	GO2	Drought, heat	10
At5g58670		Mt3g070720	0	Specific but multiple	PLC1	Phosphatidylinositol-specific phospholipase	GO4	Cold	2
At5g58700		Mt3g070720	0	Specific but multiple	PIPL	Phosphoinositide-specific phospholipase*	GO4	Drought	18
At5g58770		Mt5g070210	4e-92	Specific	DDPPS	Dehydrodolichyl diphosphate synthase	GO15	Drought, heat	10
At5g59220		Mt5g080680	9e-108	Specific	PP2C	ABA-induced protein phosphatase 2C	GO4	Drought, heat	10
At5g59310		Mt4g028370	1e-36	Multiple genes	LTP4	Lipid-transfer protein 4, nonspecific	GO2	Drought, heat	10
At5g59320		Mt4g028370	6e-39	Multiple genes	LTP3	Lipid transfer protein 3	GO2	Drought, heat	10
At5g59330		N/A	N/A	N/A	LTP	Lipid-transfer protein, nonspecific	GO2	Drought, heat	10
At5g59430		Mt2g097290	2e-75	Specific	TRP1	Telomere repeat binding protein 1	GO17	salt stress	TAIR
At5g59530		Mt8g009080	4e-113	Specific but multiple	ODO	2-oxoglutarate-dependent dioxygenase	GO5	Drought	18
At5g59720		Mt4g091590	1e-69	Multiple genes	HSP18.2	Heat shock protein 18	GO6	Drought, heat	10
At5g59780		Mt4g063100	3e-31	Specific	MYB59	Myb domain protein 59	GO3	salt stress	TAIR
At5g59820		Mt2g096540	1e-26	Less specific	Zat12	Zinc-finger (C2H2-type) family	GO3	ABS, ROS	3
At5g60060		Mt3g030050	1e-14	Low E, Uncertain	SKIP2	F-box family protein, similar to SKP1 interacting partner 2	GO17	Salinity	6
At5g60360		Mt4g079440	7e-62	Less specific	AALP	Cys proteinase, Arabidopsis aleurain-like protease	GO8	Drought, heat	10
At5g60410		Mt4g060510, Mt2g093730	0	Specific	SUMO	Small ubiquitin-like modifier E3 ligase	GO15	freezing, water deprivation	TAIR
At5g60460		Mt2g093770	5e-29	Less specific	SEC61B	Protein transporter subunit - like	GO2	Drought	18
At5g60890		Mt6g012690	1e-65	Specific	ATR1, MYB34	Altered tryptophan regulation	GO3	salt stress, abscisic acid stimulus	TAIR
At5g61290		Mt5g012130	3e-115	Specific	FMO	Flavin-containing monooxygenase family protein	GO2	Salinity	6
At5g61410		Mt5g011100	0.036	Low E, Uncertain	EMB2728	Embryo defective 2728	GO16	cold	TAIR
At5g61420		Mt5g078140	3e-21	Multiple	MYB28	MYB28-like transcription factor	GO3	cold, mannitol, NaCl	1
At5g61430		Mt6g012670	6e-93	Specific	ANAC100	Arabidopsis NAC domain containing protein 100	GO3	Drought	18
At5g61790		Mt3g098430, Mt8g095680	0	Specific	CNX1	Calnexin-like protein	GO4	Cold	1
At5g62150		Mt8g043870	3e-28	Specific	DDCR	Dihydrodipicolinate reductase-like protein	GO13	Drought	18
At5g62190		Mt1g102410	0	Very specific	PRH75	RNA helicase	GO10	Drought, heat	10
At5g62350		Mt3g008840	1e-57	Multiple	IPEI	Invertase / pectin methylesterase inhibitor family protein	GO18	Cold	2
At5g62360		Mt3g008840	3e-38	Multiple	PE	Pectinesterase family	GO13	Drought	18
At5g62470		Mt3g039990	4e-91	Specific	MYB96	Myb domain protein 96	GO3	salt stress, abscisic acid stimulus	TAIR
At5g62490		Mt4g108350	1e-59	Specific	HVA22b	ABA-responsive protein	GO5	abiotic stress, ABA	12
At5g62520		Mt3g077870	5e-26	Fairly specific	SRO5	Similar to RCD one 5	GO18	salt stress	TAIR
At5g62530		Mt4g107940	0	Unique	ALDH12A1	Aldehyde dehydrogenase 12A1	GO8	salt stress	TAIR
At5g62540		Mt4g108080	1e-90	Specific	UBC3	Ubiquitin-conjugating enzyme	GO4	ABA, drought	14
At5g62690		Mt1g101130, Mt4g019090, Mt4g019110	0	Multiple	TUB2	Tubulin bata-2	GO17	Cold	TAIR
At5g62700		Mt1g101130, Mt4g019090, Mt4g019110	0	Multiple	TUB3	Tubulin bata-3	GO17	Cold	TAIR
At5g63030.1		Mt3g077560	1e-50	Multiple	GLR	Glutaredoxin	GO1	ABS	13
At5g63370		Mt3g085650	4e-147	Specific	PK	Protein kinase	GO4	Drought, heat	10
At5g63530		Mt3g099030	3e-57	Specific	FP3	Copper chaperone (CCH)-related, Arabidopsis thaliana farnesylated protein3	GO2	Drought	18
At5g63570		Mt3g118070	0	Unique	GSA1	Glutamate 1-semialdehyde aminotransferase	GO12	Drought	18
At5g63640		Mt8g095310	2e-124	Specific but multiple	VGP	VHS domain-containing protein	GO18	Salinity	7
At5g63650		Mt8g095330, Mt2g006330	0	Specific but two genes	SRK2H	SNF1-related protein kinase 2.5	GO4	osmotic stress, salt stress	TAIR
At5g63770		Mt8g094940	0	Unique	DGK2	Diacylglycerol kinase 2	GO16	cold	TAIR
At5g63850		Mt8g094290, Mt3g096830	0	Multiple	AAP4	Amino acid permease 4	GO2	water deprivation	TAIR
At5g63980		Mt2g012510	1e-57	Specific	FRY1	Fiery 1	GO17	cold, abiotic stimulus	TAIR
At5g64230		Mt2g008960	3e-68	Unique	N/A	Unknown protein	GO18	ABA, drought	14
At5g64250		Mt3g069190	3e-155	Unique	NPD	2-nitropropane dioxygenase family	GO15	ABA, drought	14
At5g64750		Mt3g095190	1e-28	Fairly specific	ABR1	ABA repressor 1	GO3	osmotic stress, abscisic acid stimulus	TAIR
At5g64940		Mt8g091710	0	Very specific	ATH13	ABC transporter-like	GO2	Salinity	7
At5g65050		Mt7g075870, Mt8g066260	4e-28	Multiple	AGL31	MADS-box transcription factor	GO3	Drought	18
At5g65110		Mt4g079290	2e-94	Very specific	ACX2	Acyl-CoA oxidase	GO9	Drought, heat	10
At5g65140		Mt5g063080	2e-130	Very specific	TPP	Trehalose-6-phosphate phosphatase	GO11	response to cadmium ion,trehalose biosynthetic process	AtGI
At5g65260		Mt4g094260	7e-69	Specific	PABP	Poly(A)-binding protein II-like	GO15	Drought, heat	10
At5g65660		Mt8g067590	2e-29	Specific	HPRG	Hybroxyprotein-rich glycoprotein family protein	GO18	ABA, drought	14
At5g65930		Mt5g025100, Mt8g072430	0	Specific	KCBP	Kinesin-like calmodulin binding protein	GO16	Drought/dehydration	4
At5g66110		Mt4g073040	2e-55	Less specific	ATFP6	ATFP6-like protein	GO2	Drought, heat	10
At5g66190		Mt5g022300	0	Very specific	FNR 1	Ferredoxin--NADP reductase leaf isozyme chloroplast precursor	GO1	Drought	18
AT5G66210		Mt5g022030	0	Specific	CPK28	Calcium-dependent protein kinase/CDPK	GO4	ROS	3
At5g66400		Mt3g117190	1e-07	Low E, Uncertain	RAB18	Dehydrin RAB18-like protein, Responsive to ABA 18	GO6	Drought, heat	10
At5g66460		Mt5g020890	3e-152	Specific	MBM	Mannan endo-1,4-beta-mannosidase	GO11	Drought	18
At5g66580		Mt5g018720	2e-39	Less specific	N/A	Unknown protein	GO18	abiotic stress, ABA	12
At5g66760		Mt5g020050	0	Unique	SDH1-1	Succinate dehydrogenase flavoprotein alpha subunit	GO11	Drought	18
At5g66880		Mt8g079560, Mt5g018050	0	Specific but multiple	SRK2I	SNF1-related protein kinase 2.3	GO4	osmotic stress, salt stress, ABA	TAIR
At5g67030		CU571152_1020.1	0	Unique	ZEP	zeaxanthin epoxidase	GO6	Drought, osmotic stress, Salinity	7
At5g67080		Mt5g017110	6e-93	Specific	MAPKKK19	Protein kinase-like protein	GO4	Drought, heat	10
At5g67190		Mt5g016750	1e-45	Multiple	RAP2.1	AP2 domain protein RAP2.1	GO3	Cold	1
At5g67300		Mt5g016510	7e-72	Specific	MYB44	Myb domain protein 44	GO3	salt stress, abscisic acid stimulus	TAIR
At5g67320		Mt5g016370	0	Specific	HOS15	High expression of osmotically responsive genes 15	GO6	cold	TAIR
At5g67450		Mt1g018420	3e-30	Less specific and multiple	ZF1	ZINC-FINGER PROTEIN 1	GO3	cold, salinity	TAIR
At5g67580		Mt5g015340	4e-68	Specific	TRB2	Telomere repeat binding factor 2	GO3	salt stress, abscisic acid stimulus	TAIR
At5g67590		Mt4g097160	4e-61	Specific	FRO1	Frostbite 1	GO18	cold acclimation, osmotic stress	TAIR
*Gene ontology ID
1: Cell homeostasis
2: Transport/Energy
3: Regulation of transcription
4: Signal transduction
5: Response to hormone stimulus
6: Response to biotic, abiotic stresses/Defense
7: Phenyl propanoid/flavonoid/lignin metabolism
8: Amino acid/protein metabolism
9: Fatty acid/ lipid metabolism
10: Nucleotide metabolism
11: Carbohydrate metabolism
12: Photosynthesis
13: Cell wall modification
14: Aging/Ripening/cell death
15: Cellular/physiological process
16: Development
17: Other biological processes/metabolism
18: Unknown
**References
1. Kreps JA, Wu Y, Chang H-S, Zhu T, Wang X, Harper JF (2002) Transcriptome Changes for Arabidopsis in Response to Salt, Osmotic, and Cold Stress. Plant Physiol. 130(4): 2129–2141.
2. Maruyama K, Sakuma Y, Kasuga M, Seki M et al. (2004) Identification of cold-inducible downstream genes of the Arabidopsis DREB1A/CBF3 transcription factor using two microarray system. The Plant Journal 38: 982-993
3. Davletova S, Schlauch K, Coutu J, Mittler R (2005) The Zinc-Finger Protein Zat12 Plays a Central Role in Reactive Oxygen and Abiotic Stress Signaling in Arabidopsis1, Plant Physiol. 139(2): 847–856
4. Trana LP, Nakashima K, Sakuma Y, Simpsonb SD, et al. (2004) Isolation and Functional Analysis of Arabidopsis Stress-Inducible NAC Transcription Factors That Bind to a Drought-Responsive cis-Element in the early responsive to dehydration stress 1 Promoter. The Plant Cell 16:2481-2498
5. Zhu J, Verslues PE, Zheng X, Lee BH et al. (2005) HOS10 encodes an R2R3-type MYB transcription factor essential for cold acclimation in plants. PNAS USA 102: 9966-9971
6. Gong Q, Li P, Ma S, Indu Rupassara S, Bohnert HJ (2005) Salinity stress adaptation competance in the extremophile Thellungiella haplophila in comparison with its relative Arabidopsis thaliana. Plant J. 44: 826-839.
7. Taji T, Seki M, Satou M, Sakurai T et al. (2004) Comparative Genomics in Salt Tolerance between Arabidopsis and Arabidopsis-Related Halophyte Salt Cress Using Arabidopsis Microarray. Plant Physiol. 135(3): 1697–1709.
8. Dubouzet JG, Sakuma Y, Ito Y, Kasuga M et al. (2003) OsDREB genes in rice, Oryza sativa L., encode transcription activators that function in drought-, high-salt- and cold-responsive gene expression. Plant J. 33: 751-763.
9. Chini A, Grant JJ, Seki M, Shinozaki et al. (2004) Drought tolerance established by enhanced expression of the CC–NBS–LRR gene, ADR1, requires salicylic acid, EDS1 and ABI1. 38: 810-822.
10. Rizhsky L, Liang H, Shuman J, Shulaev V, Davletova S, Mittler R (2004) When Defense Pathways Collide. The Response of Arabidopsis to a Combination of Drought and Heat Stress1. Plant Physiol. 134(4): 1683–1696.
11. Taji T, Seki M, Yamaguchi-Shinozaki K, Kamada H et al. (1999) Mapping of 25 drought-inducible genes, RD and ERD in Arabidopsis thaliana. Plant Cell Physiol. 40: 119-123.
12. Zhang W, Ruan J, Ho TD, You Y et al. (2005) Cis-regulatory element based targeted gene finding: genome-wide identification of abscisic acid- and abiotic stress-responsive genes in Arabidopsis thaliana. Bioinformatics 21(14):3074-3081
13. Mittler R, Vanderauwera S, Gollery M, Van Breusegem F (2004) Reactive oxygen gene network of plants. Trends in Plant Sci. 9:490-498.
14. de Torres-Zabala M, Truman W, Bennett MH, Lafforgue G et al. (2007) Pseudomonas syringae pv. tomato hijacks the Arabidopsis abscisic acid signalling pathway to cause disease. EMBO J. 26: 1434–1443
15. Shou H, Bordallo P, Fan J-B, Yeakley JM et al. (2004) Expression of an active tobacco mitogen-activated protein kinase kinase kinase enhances freezing tolerance in transgenic maize. PNAS USA 101:3298-3303
16. Qiu Q-S, Guo Y, Dietrich MA, Schumaker KS et al. (2002) Regulation of SOS1, a plasma membrane Na/H exchanger in Arabidopsis thaliana, SOS2 and SOS3. PNAS USA 99: 8436-8441
17. Lee S, Lee EJ, Yang EJ, Lee JE et al. (2004) Proteomic identification of annexins, calcium-dependent membrane binding proteins that mediate osmotic stress and abscisic acid signal transduction in Arabidopsis. The Plant Cell 16: 1378-1391
18. Choi H-K, Iandolino A, Goes da Silva F, Cook DR (2013) Water defict modulates the response of Vitis vinifera to the Pierce's disease pathogen Xylella fastidiosa. Mol. Plant-Microbe Int. 26: 643-657
19: TAIR; Arabidosis database (http://www.arabidopsis.org)
20: AtGI; Arabidopsis gene index
